# Role of Adipose Tissue as an Inflammatory Organ in Human Diseases

A. Schäffler, U. Müller-Ladner, J. Schölmerich, and C. Büchler

Department of Internal Medicine I (A.S., J.S., C.B.), University of Regensburg, 93049 Regensburg, Germany; and  
Department of Rheumatology and Clinical Immunology (U.M.-L.), University of Giessen, 61231 Giessen, Germany

**Reviews on the inflammatory role of adipose tissue outside the field of metabolism are rare. There is increasing evidence provided by numerous basic research studies from nearly all internal medicine subspecializations that adipocytes and adipocytokines are involved in primary inflammatory processes and diseases. Therefore, it is the aim of the present review to**

**discuss and to summarize the current knowledge on the inflammatory role of adipocytokines and special types of regional adipocytes such as retroorbital, synovial, visceral, subdermal, peritoneal, and bone marrow adipocytes in internal medicine diseases. Future clinical and therapeutic implications are discussed. (Endocrine Reviews 27: 449–467, 2006)**

- I. Introduction and Focus
- II. From the Mesenchymal Stem Cell toward Adipose Tissue
  - A. Cellular development
  - B. Transcriptional regulation
- III. Adipocytes and Adipocytokines in Inflammatory Diseases
  - A. Rheumatology
  - B. Gastroenterology
  - C. Endocrinology
  - D. Immunology
  - E. Infectiology
  - F. Hematology

## I. Introduction and Focus

**D**URING THE PAST 10 yr, the understanding of the physiological and pathophysiological role of the adipocyte has been completely changed. Once considered to be a passive type of connective tissue storing excess energy as triglycerides, adipose tissue has now been established as a real endocrine organ coupling (neuro)-endocrine and met-

abolic signaling. This new point of view was reviewed excellently by Kershaw and Flier (1). Secretory products of preadipocytes and mature adipocytes, the so-called adipocytokines (2), clearly regulate energy homeostasis, appetite/satiety, reproduction, and insulin sensitivity and influence neuroendocrine, endothelial, immunological, hematological, angiogenetic, and vascular functions in an endocrine, paracrine, and autocrine manner. Adipocytokines such as adiponectin are currently discussed as new drug targets in treating atherosclerosis and single components of the metabolic syndrome (3), such as visceral obesity, hypertension, insulin resistance, type 2 diabetes mellitus, and dyslipidemia (4).

In contrast to numerous and excellent publications describing the role of adipose tissue and adipocytokines in metabolic syndrome and atherosclerosis (5, 6), reviews on the inflammatory role of adipose tissue outside the field of metabolism are rare (7–9). However, visceral obesity is characterized by a C-C motif chemokine receptor-2-mediated infiltration of adipose tissue by monocytes (9, 10) and is being regarded more and more as a chronic and low-grade state of inflammation causing whole body insulin resistance (11). There is increasing evidence provided by numerous basic research studies from nearly all internal medicine subspecializations that adipocytes and adipocytokines are involved in primary inflammatory processes and diseases (12, 13). Comprehensive and interdisciplinary reviews summarizing the inflammatory role of “alternative” stores of adipose tissue are currently not available.

Therefore, it is the aim of the present review to discuss and to summarize the inflammatory role of adipocytokines and special types of regional adipocytes, such as retroorbital, synovial, visceral, subdermal, peritoneal, and bone marrow adipocytes in internal medicine diseases (Table 1). Due to the criteria mentioned above, it is not the aim of the present review to discuss the role of adipocytes in the context of visceral obesity, insulin resistance, type 2 diabetes mellitus, hypertension, dyslipidemia, metabolic syndrome, atherosclerosis, or lipodystrophic syndromes.

### First Published Online May 9, 2006

Abbreviations: ADD1/SREBP1, adipocyte determination- and differentiation-dependent factor-1 / sterol regulatory element binding protein-1; AdipoR1, adiponectin receptor type 1; AdipoR2, adiponectin receptor type 2; BMI, body mass index; C/EBP, CCAAT enhancer binding protein; CFU, colony-forming unit; CORS-26, collagenous repeat containing sequence of 26 kDa protein; CRP, C-reactive protein; CT, computed tomography; Foxa2, forkhead box A2; Foxo1, forkhead box O1; GATA-2, GATA binding protein-2; HMW, high molecular weight; IBMX, isobutylmethylxanthine; KLF, Krüppel-like transcription factor; Krox20, Krox-20 homolog *Drosophila*, previously EGR2 early growth response 2; LPL, lipoprotein lipase; LPS, lipopolysaccharide; MCP-1, monocyte chemoattractant protein-1; M-CSF, macrophage colony-stimulating factor; MMP, matrix metalloproteinase; NAFLD, nonalcoholic fatty liver disease; NASH, nonalcoholic steatohepatitis; NF- $\kappa$ B, nuclear factor- $\kappa$ B; OA, osteoarthritis; PPAR, peroxisome proliferator-activated receptor; PPARE, PPAR response element; Pref-1, preadipocyte factor-1; RA, rheumatoid arthritis; RELM, resistin-like molecule; RXR $\alpha$ , retinoid X receptor  $\alpha$ ; sFRP, secreted frizzled related protein-1; STAT, signal transducer and activator of transcription.

*Endocrine Reviews* is published by The Endocrine Society (<http://www.endo-society.org>), the foremost professional society serving the endocrine community.

TABLE 1. Role of different adipose tissue depots, regional adipocytes, and adipocytokines in the pathophysiology of inflammatory human diseases

| Type of adipose tissue/ adipocytes        | Internal medicine subspecialization | Inflammatory disease                        |
|-------------------------------------------|-------------------------------------|---------------------------------------------|
| Synovial adipocytes/infrapatellar fat pad | Rheumatology                        | OA, RA                                      |
| Mesenteric/visceral adipocytes            | Gastroenterology                    | Mesenteric panniculitis, acute pancreatitis |
|                                           | Hepatology                          | NASH/NAFLD                                  |
| Creeping fat                              | Gastroenterology                    | Crohn's disease                             |
| Peritoneal adipocytes                     | Gastroenterology                    | Peritonitis, peritoneal tumor spread        |
| Retroorbital adipocytes                   | Endocrinology                       | Graves' ophthalmopathy                      |
| Subdermal adipocytes                      | Endocrinology                       | Pretibial dermopathy                        |
| Bone marrow adipocytes                    | Hematology                          | Hematopoiesis, leukemia                     |
|                                           | Osteology                           | Osteoporosis, bone diseases                 |
| Secreted adipocytokines                   | Immunology                          | Monocyte/macrophage function                |
|                                           | Hepatology                          | NASH/NAFLD                                  |
| All adipose tissues                       | Infectiology                        | Reservoir of microbial infection            |

Due to the high number of references supporting the items mentioned in the table, the detailed publications must be obtained from the respective sections within the text.

II. From the Mesenchymal Stem Cell toward Adipose Tissue

A. Cellular development

Adipocytes differentiate from a pluripotent mesenchymal stem cell (14) that has the potential for chondrogenic, osteogenic, myogenic, and adipogenic differentiation (15, 16). Recent studies demonstrated that pluripotent stem cells can be obtained from stromal cells isolated from mature adipose tissue (17). The subsequent development and differentiation into mature adipocytes is highly regulated and undergoes uniform steps (Fig. 1) of commitment, cell contact, mitosis, clonal expansion, growth arrest, and maturation (5, 18–20).

The commitment (determination) of the pluripotent mesenchymal stem cell to the adipocyte lineage (15) is triggered mainly by mechanisms yet to be identified and creates an adipoblast. The first step in adipogenesis is the reentry of growth-arrested preadipocytes into the cell cycle and the subsequent clonal expansion. This step is regulated by the

phosphorylation state of the tumor suppressor gene Rb (retinoblastoma protein), its interaction with the transcription factor E2F, and the subsequent activation/deactivation of cyclin-dependent kinases (21). After cell-to-cell contact, an early preadipocyte of first order arises and expresses early genes such as  $\alpha_2$ Col6 ( $\alpha_2$  chain of collagen 6), IGF-I, and lipoprotein lipase (LPL). After mitosis and clonal expansion, the preadipocyte of second order undergoes growth arrest. Only these growth-arrested preadipocytes can differentiate into mature adipocytes. This ability for further differentiation depends on the expression of early and intermediate markers of differentiation (22, 23), such as the typical adipogenic transcription factors CCAAT-enhancer binding protein (C/EBP)  $\beta$ , C/EBP $\delta$ , peroxisome proliferator activated receptor (PPAR)  $\gamma_2$ , and adipocyte determination- and differentiation-dependent factor-1 (ADD1)/sterol regulatory element binding protein-1 (SREBP1). As a consequence of these transcriptional main events, immature adipocytes begin to accumulate lipid droplets and to express late markers

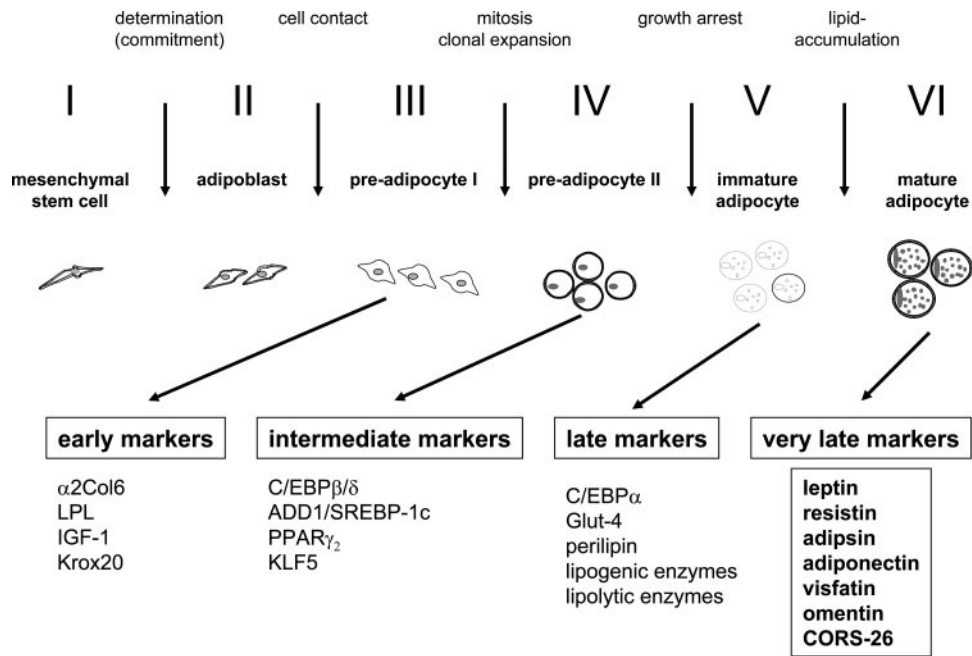

FIG. 1. Cellular development and gene expression profile during adipocyte differentiation. Glut-4, Glucose transporter-4.

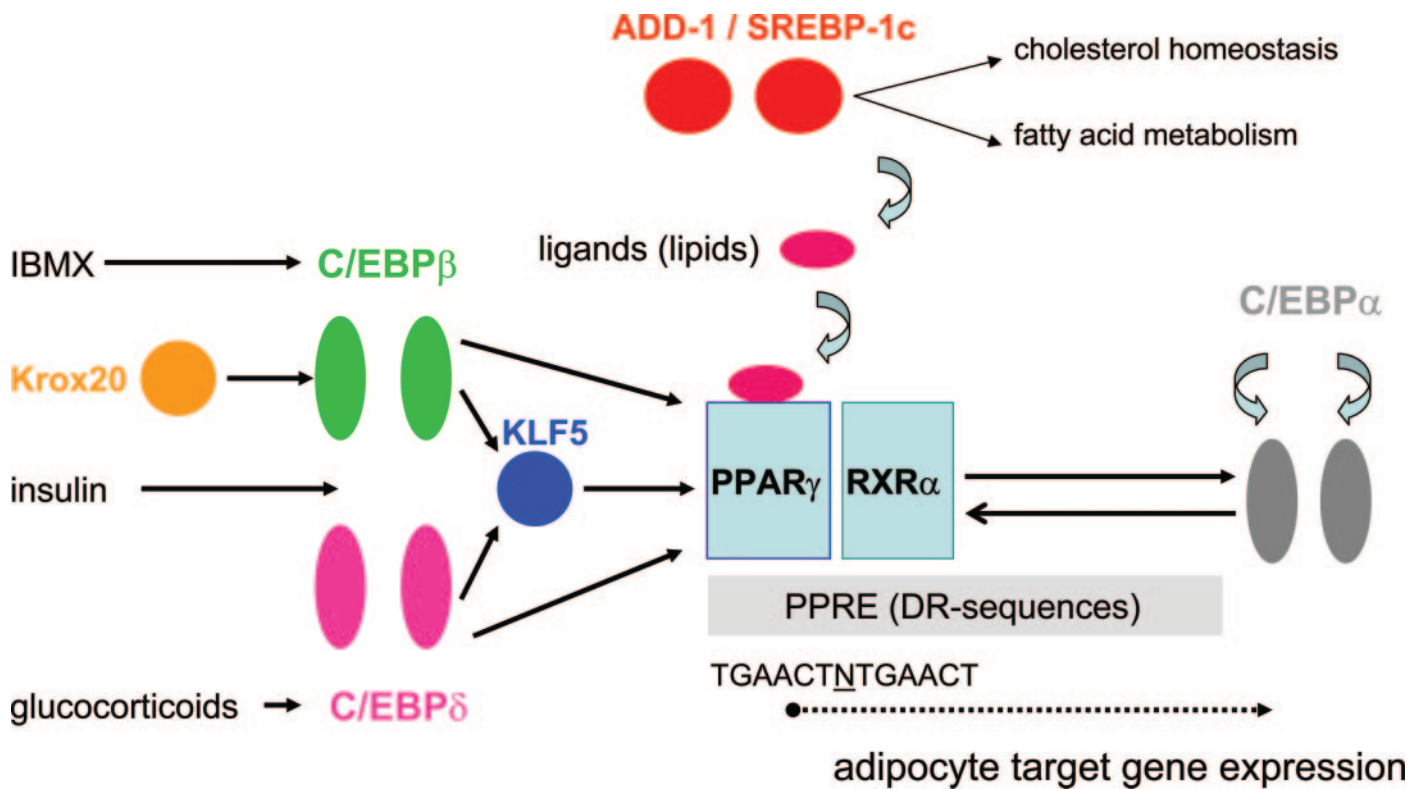

FIG. 2. Transcriptional control of adipocyte differentiation. Stimulatory factors regulating adipogenesis. Hormonal stimuli are necessary for the induction of adipocyte differentiation. The different stages of adipocyte differentiation are controlled by a network of stimulatory and adipogenic transcription factors.

of differentiation such as C/EBP $\alpha$ , glucose transporter-4, perilipin, and lipogenic and lipolytic enzymes. During the last decade, it has become evident that these mature adipocytes are characterized by the expression and secretion of highly specific and very late markers of differentiation such as leptin (24), adiponectin (4), resistin (25), visfatin (26, 27), omentin (28), adipon (29), and collagenous repeat containing sequence of 26 kDa protein (CORS-26) (30). These molecules not only regulate energy, glucose, and lipoprotein metabolism (31) but also represent pro- and antiinflammatory mediators of the adipose tissue (7, 13). In a general context of inflammation, adiponectin (32, 33) and CORS-26 (34) seem to represent more antiinflammatory adipocytokines, whereas resistin (35) and leptin (36) seem to act as proinflammatory adipocytokines.

### B. Transcriptional regulation

The cellular and transcriptional mechanisms controlling adipogenesis have been elucidated in detail mainly in several rodent cell lines (*e.g.*, 3T3-L1 preadipocytes) and also human adipocytes. The detailed molecular mechanisms of adipocyte differentiation are characterized by a complex and highly regulated interplay of stimulatory (Fig. 2) and inhibitory (Fig. 3) transcription factors during certain phases of the differentiation process. The molecular concept of adipocyte differentiation has been summarized in several excellent reviews (5, 18–21, 37–40). Although several transcriptional key events regulating the differentiation of preadipocytes into mature adipocytes have been identified in the last decade,

master genes committing the multipotent mesenchymal stem cell to adipoblasts are still waiting to be discovered (15). Most recently, transcriptional coactivator with PDZ-binding motif (TAZ) was identified as an early “molecular rheostat” modulating mesenchymal stem cell differentiation (41).

Adipocyte differentiation is characterized by two contrary transcriptional events (transcriptional remodeling): the up-regulation of stimulatory transcriptional regulators during adipogenic conversion (Fig. 2) and the down-regulation of inhibitory transcriptional regulators in early preadipocytes and adipoblasts (Fig. 3).

The zinc finger transcription factor Krox20 (Krox-20 homolog *Drosophila*, previously EGR2 early growth response 2) is expressed in preadipocytes and represents one of the earliest factors becoming induced during adipogenesis (42). Krox20 acts upstream of the C/EBP $\beta$  gene by transactivation of the C/EBP $\beta$  gene promoter (43). Hormonal stimuli such as insulin and glucocorticoids or isobutylmethylxanthine (IBMX) trigger adipogenic differentiation by causing a transient induction of C/EBP $\beta$  and C/EBP $\delta$  expression during the early phase of adipogenesis at the stage of the preadipocyte (dexamethasone increases C/EBP $\delta$  gene expression, whereas isobutylmethylxanthine increases C/EBP $\beta$  gene expression). These C/EBP transcription factors (44) consist of a C terminal, a basic DNA binding domain, and a leucine zipper domain mediating homo-/heterodimerization.

C/EBP $\beta$  and C/EBP $\delta$  together induce the expression of Krüppel-like transcription factor (KLF) 5, a zinc finger transcription factor (42) that activates the PPAR $\gamma$  promoter (45).



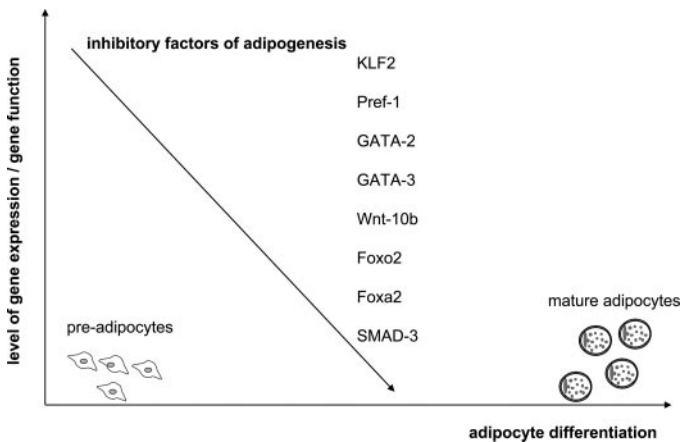

FIG. 3. Transcriptional control of adipocyte differentiation. Inhibitory factors regulating adipogenesis. The down-regulation of gene expression/gene function of inhibitory factors normally blocking adipocyte differentiation in preadipocytes is a prerequisite of the adipogenic differentiation program. Wnt-10b, Wingless-type MMTV integration site family member 10b.

The simultaneous activation of C/EBP $\beta$ , C/EBP $\delta$ , and KLF5 strongly induces the expression of PPAR $\gamma_2$ . PPAR $\gamma_2$  (46, 47) belongs to the ligand-activated nuclear receptors of the thyroid, steroid, and vitamin D receptor family and is characterized by a ligand-activation domain and a DNA binding domain consisting of two zinc finger motifs. PPAR $\gamma_2$  represents the transcriptional master regulator of adipocyte differentiation, and, together with C/EBP $\alpha$ , it is responsible for the maintenance of the fully differentiated phenotype. In parallel, as yet unidentified lipid ligands are produced via ADD1/SREBP1, which additionally activates PPAR $\gamma_2$ . ADD1/SREBP1 (48) belongs to the family of basic helix-loop-helix transcription factors possessing a dual DNA specificity by binding to E-box sequences and non-E-box sequences (sterol responsive elements).

PPAR $\gamma_2$  is only active as an obligate heterodimer with retinoid X receptor (RXR)  $\alpha$ . This complex binds to specific recognition elements, PPAR response elements (PPREs), within the promoter regions of adipocyte-specific target genes. These PPREs consist of a so-called *DR-1-Motif* [TGAAGTNTGAAGT] (direct repeat of the nuclear receptor hexameric DNA core recognition motif spaced by one nucleotide). After induction and activation of PPAR $\gamma_2$ , the expression of C/EBP $\alpha$  is induced. C/EBP $\alpha$  can be regarded as a transcriptional master regulator of late adipocyte differentiation, and it is responsible for the maintenance of the fully differentiated phenotype. C/EBP $\alpha$  induces its own expression as well as the transactivation of PPAR $\gamma_2$  via specific C/EBP binding sites in the promoter regions of both genes (21).

Besides this positive cascade of transcriptional activation, inhibitory transcription factors expressed in preadipocytes become down-regulated because otherwise they would inhibit the differentiation program (Fig. 3). Among these inhibitory pathways of adipocyte differentiation, the zinc finger transcription factors GATA-binding protein-2 and -3 (GATA-2 and GATA-3) (49) function as inhibitors of adipogenesis by repressing PPAR $\gamma_2$  promoter activity (50) and by forming protein complexes with C/EBP $\alpha$  and C/EBP $\beta$  (51).

An inhibition of preadipocyte to adipocyte transition is also exerted by activation of the Wnt signaling cascade (52, 53). KLF2 also represents an inhibitory transcription factor that is expressed in preadipocytes and becomes down-regulated during adipogenesis. KLF2 does not affect the commitment of the mesenchymal stem cell, but it maintains the preadipocyte state and inhibits the transition into adipocytes (54). KLF2 functions as an inhibitory transcription factor by repressing PPAR $\gamma_2$  promoter activity (55) and by restoration of preadipocyte factor-1 (Pref-1) (54). Pref-1, one of the epidermal growth factor-like proteins, is a secreted preadipocyte factor synthesized as a membrane protein that undergoes cleaving of its ectodomain to generate a soluble form (56). Pref-1 inhibits adipocyte differentiation and is induced by dexamethasone and down-regulated during adipogenesis. Other recently described signaling molecules negatively interfering with adipogenesis are forkhead box O1 (Foxo1) and A2 (Foxa2), mothers against decapentaplegic *Drosophila* homolog 3 (SMAD-3), and wingless type MMTV integration site family member 10b (Wnt-10b) (53, 57).

Efforts to understand the highly regulated balance between positive and negative intracellular and extracellular factors governing adipogenesis are still in progress and may have important therapeutic implications.

### III. Adipocytes and Adipocytokines in Inflammatory Diseases

#### A. Rheumatology

1. *Adipose tissue-derived effector molecules in arthritis and rheumatic diseases.* Less than a decade ago, adipose tissue-derived effector molecules began to be investigated in rheumatological disorders. In rheumatoid arthritis (RA), leptin was found to be present in serum, and it correlated with percentage body fat in some patient populations but not with disease activity (58) or individual parameters of inflammation, such as erythrocyte sedimentation rate and C-reactive protein (CRP) (59). Although there is a direct link between key inflammatory molecules in arthritides such as IL-6, TNF- $\alpha$ , and leptin, chronic inflammation appears to reduce plasma leptin levels in patients with RA (60), an effect that might be based on an intensive consumption in the arthritic joint (61). In osteoarthritis (OA) patients, leptin could also be found in synovial fluid and correlated to a similar extent as in RA with the body mass index (BMI) of the patients (62). In juvenile arthritis, leptin was a marker for the nutritional status of the patient and could not be used for differentiation of active and inactive disease (63). In less joint-associated rheumatic diseases such as systemic lupus erythematosus, the affected patients showed higher serum leptin levels than BMI-adjusted healthy controls, but similar to RA and OA, there was also no correlation between disease activity and leptin serum levels (64). The only disease with a positive correlation between activity and leptin levels at present is Behçets disease, a common vasculitis around the Mediterranean and the Near and Far East (65).

Although articular and synovial adipose tissue is one of the ubiquitous components of a human joint, little is known about its local function, especially with regard to arthritis.

However, recent studies have revealed novel links between adipose tissue, adipocytokines (*e.g.*, adiponectin and resistin), and arthritides (61). In particular, classical adipocytokines such as adiponectin (66) and the adiponectin-paralogous gene CORS-26 (30) are expressed both by synovial fibroblasts and directly by articular adipocytes. However, it is important to emphasize that many proinflammatory cytokines (IL-6 and TNF- $\alpha$ ) and adipocytokines (leptin and resistin) are also produced by articular nonadipocytic cells, such as chondrocytes or immigrated inflammatory cells, and that point has to be considered by interpreting data derived from total articular tissue or synovial fluid.

Ushiyama *et al.* (67) have demonstrated the presence of proinflammatory cytokines and growth factors in the infrapatellar fat pad from patients with OA, and we could show that the adipocytokines adiponectin and resistin are present in high levels in synovial fluid (and not in serum) of patients with RA and OA (68). Furthermore, not only adipocytes but also other activated cells of the mesenchymal lineage such as synovial fibroblasts within the synovial lining, the perivascular area, and the inflamed sublining are main producers of adiponectin. Not only could this property be maintained in culture, but the respective adiponectin receptors necessary to transfer the adiponectin-dependent signals into the articular effector cells appeared to be characteristic for mesenchymal cells, such as articular fibroblasts, periarticular adipocytes, cartilage, and bone. These cells can express type I and type II adiponectin receptors from the embryonic state (69) to the adult human organism. In addition, novel members of the recently discovered TNF/C1q superfamily are present in arthritic synovium. For example, CORS-26 could also be found in murine and human synovial adipocytes (70). Interestingly, its chromosomal localization was mapped to the chromosome locus 15A2, which links this adipokine directly to experimental arthritis, because the linkage loci for both MRL *lpr/lpr*- and proteoglycan-induced arthritis (two experimental animal models for arthritis) are positioned within the same genomic region.

According to current data, one of the main producers of articular leptin is chondrocytes (62, 71), which appear to be part of a feedback loop because chondrocytes also express the leptin receptor OB-Rb. Moreover, a negative effect of leptin on cartilage metabolism has been reported. When acting in combination with interferon- $\gamma$ , nitric oxide synthesis in chondrocytes is significantly increased (72). Leptin levels also correlate with osteophytic destruction and growth factor IGF-I and TGF $\beta$ 1 expression. Interestingly, the altered bone formation stimulated by leptin is not only based on its antiosteogenic potential, but this inhibitory capability appears to be directly linked to effects on mesenchymal stem cells, stromal precursor cells, and the sympathetic nervous system via high-affinity leptin receptors (73).

Adipocytokines such as adiponectin have significant effects on the metabolism of articular fibroblasts, and this stimulatory capacity appears to be highly selective, because only two of the main mediators of pathophysiology in RA, *i.e.*, IL-6 and proMMP-1, are being synthesized under the influence of adiponectin, whereas most others, including proinflammatory substances such as IL-1, TNF $\alpha$ , vascular endothelial growth factor, and TGF $\beta$  as well as protective cytokines such as IL-4

and IL-10, are not affected (66, 74). However, the only pathway known to be involved in adiponectin receptor signaling as well as in key pathways operative in RA synovial fibroblasts or osteoblasts is the p38 MAPK pathway (75). This selectivity is further supported by the finding that neither protein kinase A nor protein kinase C enhances any of these effector molecules in rheumatoid synovial fibroblasts that were mentioned above. Of note, at least *in vitro* the phenotypic difference between fibroblasts and adipocytes appears marginal as cytokines are capable of transforming fibroblasts into adipocytes (76), and leptin can stimulate the differentiation of mesenchymal stem cells into osteoblasts, chondrocytes, and adipocytes (77). Resistin, on the other hand, was able to up-regulate IL-6 and TNF $\alpha$  in human peripheral blood mononuclear cells and induced severe arthritis when injected in nonarthritic murine joints (78). In contrast to adiponectin, resistin regulation was found to be predominantly nuclear factor- $\kappa$ B (NF- $\kappa$ B)-dependent (78).

**2. Animal models.** Experimental murine models could show that leptin is directly involved in immune phenomena in arthritis. Leptin-deficient *ob-/ob-* mice developed a substantially less active antigen-induced arthritis than wild-type mice, and similar results were seen in leptin receptor-deficient mice (79). These effects were paralleled by lower concentrations of the proinflammatory cytokines TNF $\alpha$  and IL-1 $\beta$ , a switch to joint-protective Th2 cytokines, and a decreased proliferative response when performing an antigen challenge of lymph node cells (79). Interestingly, although secondary cellular immune responses were also diminished, which was illustrated by a reduced antigen-specific T cell and B cell response in combination with higher IL-10 and lower interferon- $\gamma$  production, no reduction of cartilage degradation could be observed. The latter finding was supported by the lack of leptin-dependent effects on zymosan-induced arthritis, a murine arthritis model that develops independent of adaptive immunity (80). In addition, the expression of chemokines monocyte chemoattractant protein (MCP)-1 and macrophage inflammatory protein-1 $\alpha$  by adipocytes and the presence of the novel CC-chemokine macrophage inflammatory protein-related protein-2 in murine fat pads indicates that adipocytes may even be responsible for chemoattraction of other inflammatory cells (81).

**Clinical and therapeutical implications:** As outlined above, leptin is directly linked to the neuroendocrine system. In patients with RA and systemic lupus erythematosus, serum levels of androstenedione correlated negatively with the serum levels of leptin and might be responsible, at least in part, for the known hypoandrogenicity in these patients (82). Conversely, although not related to systemic inflammatory parameters, leptin appears to exert protective effects in septic arthritis, because recombinant leptin reduced both inflammation and articular destruction in *Staphylococcus aureus*-induced arthritis without reducing the viability of bacteria *in vivo* (83). Medication also has an effect on serum leptin levels, but this effect depends on the type of the antiarthritic drug, because it could be shown that the majority of disease-modifying antiarthritic drugs were associated with low leptin levels, whereas patients under therapy with methotrexate showed higher leptin plasma concentrations (61), and anti-TNF therapy did not alter leptin serum levels (60).

In contrast to leptin, adiponectin exerts significant proinflammatory and matrix-degrading effects in arthritis (66). Moreover, it can no longer be regarded as a strictly adipocyte-specific protein, at least not in the context of chronic inflammation. In human RA, adipocytes might be the key interaction partners for the matrix-degrading synovial fibroblasts (84), which are specifically active at sites of destruction (85). The hypothesis is supported by the finding that adiponectin is a strong stimulator with regard to the synthesis of cytokines, growth factors, and matrix metalloproteinases (MMPs). Moreover, it is likely that the ameliorating effect on inflammatory and joint-destructive mechanisms, especially on IL-6 and MMP-1-dependent pathways of TNF-inhibitors is, at least in part, based on an anti-adipocytokine effect (66, 86). This effect appears restricted to adiponectin, because treatment with TNF inhibitors did not alter leptin plasma levels in patients with RA (60).

Taken together, the current data support the idea that (peri)articular adipose tissue and adipocytokines can no longer be regarded innocent bystanders in arthritides because they modulate substantially the expression of local synovial cytokines and matrix-degrading enzymes and thus may also become an attractive candidate target for novel antiarthritic strategies.

B. Gastroenterology

1. *Crohn's disease.* Patients suffering from Crohn's disease regularly develop an accumulation of intraabdominal, mesenteric adipose tissue from the onset of the disease. Accordingly, mesenteric obesity represents a basic and common feature of Crohn's disease (87) that cannot simply be diagnosed by measuring the patient's BMI. However, this increased mesenteric adipose tissue mass is nowadays routinely diagnosed by computed tomography (CT) and magnetic resonance imaging techniques (87, 88). During surgery, this special type of mesenteric adipose tissue presents as tissue hypertrophy, showing signs of inflammation and an increased stiffness during tissue palpation. Regional lymphadenopathy might also be present. Dr. Burril B. Crohn, who gave his name to this chronic inflammatory bowel disease, initially described the changes in the appearance of the mesenteric adipose tissue. The connective and adipose tissue changes contiguous to the involved intestine in Crohn's dis-

ease are characterized by (13, 89): 1) mesenteric fat hypertrophy; 2) creeping fat, meaning fat creeping upon the bowel; 3) fat wrapping, meaning enveloping the bowel surface/circumference; 4) fibrofatty proliferation, macrophage infiltration; 5) regional lymphadenopathy; 6) tissue fibrosis; 7) perivascular and transmural inflammation; and 8) intimal/medial thickening of vessels (90–94).

Interestingly, fat wrapping/creeping fat correlates with ulceration, stricture formation, transmural inflammation, wall thickness, and internal bowel diameter (90).

It is a matter of controversy (13, 89) whether the development of creeping fat is a causative or secondary phenomenon (13, 89) to the underlying intestinal disease (Table 2). Some groups interpret fat wrapping as a phenomenon secondary to the process of transmural inflammation and the subsequent release of proinflammatory cytokines such as TGF- $\beta_1$  and TNF- $\alpha$  (90, 93, 95, 96) from the intestinal mucosa and from macrophages present within the adjacent soft tissue. As a consequence, PPAR $\gamma$  becomes activated and could then promote adipose tissue hypertrophy that could build a barrier against the transmural inflammation.

In contrast, an increasing body of evidence suggests that the mesenteric adipose tissue plays a more active role in the pathogenesis of creeping fat and mesenteric inflammation (13, 89, 97). Adipocytes not only respond to proinflammatory cytokines but also are known to secrete proinflammatory and antiinflammatory mediators such as TNF- $\alpha$  (87), IL-10 (98), vascular endothelial growth factor (99), leptin (100), macrophage-colony-stimulating factor (M-CSF) (101), regulated upon activation, normal T cell expressed and secreted (RANTES) (CCL5) (98), and adiponectin (102). The specific overexpression of TNF- $\alpha$  (87), leptin (100), M-CSF (101), and adiponectin (102) in creeping fat derived from patients with Crohn's disease argues for a more active role of the adipose tissue. Furthermore, it was demonstrated that mesenteric adipocytes secrete higher amounts of TNF- $\alpha$  than mesenteric monocytes/macrophages (87). Similarly, leptin mRNA levels were reported to be significantly higher in mesenteric adipose tissue from patients with either Crohn's disease or ulcerative colitis when compared with control patients with colonic carcinoma as a noninflammatory disease (100). Luminal application of leptin can even cause colonic epithelial wall damage and neutrophil inflammation (103).

TABLE 2. Arguments for a causative or a secondary role of mesenteric adipose tissue hypertrophy in Crohn's disease

| Creeping fat: arguments for a causative role                                                        | Creeping fat: arguments for a secondary role                            |
|-----------------------------------------------------------------------------------------------------|-------------------------------------------------------------------------|
| Mesenteric fat hypertrophy present at onset of disease                                              | Transmural inflammation might cause adjacent adipose tissue hypertrophy |
| Axial polarity of inflammation and ulcers along the mesenteric border                               | Mesenteric fat hypertrophy with a putative barrier function             |
| Adipocytes secreting both pro- and antiinflammatory mediators                                       | Chronic intestinal cytokine release                                     |
| Amount of TNF- $\alpha$ secretion higher from mesenteric adipocytes than from macrophages           | Chronic lymphoid tissue cytokine release                                |
| Up-regulation of PPAR $\gamma$ expression drives adipogenesis                                       | Perinodal adipose tissue hypertrophy                                    |
| Secretion of chemoattractants from adipocytes (MCP-1, M-CSF) attracts monocytes into adipose tissue | Regional lymphadenopathy                                                |

There is a controversial discussion as to whether creeping fat in Crohn's disease is a primary and causative phenomenon (*left column*) or a secondary phenomenon simply caused by the chronic and transmural inflammation of the gut (*right column*). Further information regarding this controversy can be found in *Section III.B* and recent reviews (9, 13, 89).



**Clinical and therapeutic implications:** The activation of PPAR $\gamma$  by synthetic ligands such as thiazolidinediones reduces proinflammatory TNF- $\alpha$  and leptin gene expression and increases antiinflammatory adiponectin gene expression in adipocytes (104). Furthermore, PPAR $\gamma$  activation diminishes the activation of inflammatory response genes by decreasing the activity of the NF- $\kappa$ B, activator protein-1, and signal transducer and activator of transcription (STAT)-1 transcription factor pathways (105). Hence, PPAR $\gamma$  activation fosters an antiinflammatory microenvironment within mesenteric adipose tissue. In detail, activating ligands of PPAR $\gamma$  were shown to inhibit the expression of proinflammatory cytokines such as IL-1 $\beta$ , IL-2, IL-6, IL-8, MCP-1, TNF- $\alpha$ , and MMPs by mechanisms including transcriptional regulation and nontranscriptional interference with signaling pathways such as NF- $\kappa$ B (p65, p50), activator protein-1 (fos/jun), MAPK cascade, and STAT-1/STAT-3 (105, 106). These observations have been made in different cell types such as monocyte/macrophages, endothelial cells, smooth muscle cells, and adipocytes. Because these cell types are abundantly expressed in the adipose tissue, the control function of the PPAR $\gamma$ /RXR heterodimer in inflammation (106) could provide the basis for potential therapeutic applications in inflammation-related diseases such as chronic inflammatory bowel disease (106, 107).

Recently, increasing data have pointed to this nuclear hormone receptor as a novel antiinflammatory mediator with broad therapeutic potential in ulcerative colitis and Crohn's (107, 108). The PPAR $\gamma$  ligands troglitazone and rosiglitazone were tested in an experimental animal model, the dextran sodium sulfate-induced colitis, and shown to inhibit the colonic inflammation, possibly by attenuating cytokine gene expression in colon epithelial cells via inhibiting the activation of NF- $\kappa$ B. Similarly, a gene therapy approach (109, 110) using PPAR $\gamma$  proved to be successful in the treatment of dextran sodium sulfate-induced colitis. Desreumaux *et al.* (107) were successful in ameliorating colitis in an experimental mouse model (trinitrobenzene sulfonic acid-induced colitis) by treatment with PPAR $\gamma$  and RXR ligands. Even in ischemia-induced colitis, PPAR $\gamma$  seems to mediate potent antiinflammatory effects (111).

**2. Mesenteric panniculitis.** Although there are numerous case reports and clinical descriptions, the pathophysiology of mesenteric panniculitis is completely unknown (112–115). The disease has been described by several synonyms such as Pfeiffer-Weber-Christian disease, mesenteric panniculitis, xanthogranulomatous mesenteritis, mesenteric lipodystrophy, retractile mesenteritis or, sclerosing mesenteritis). These terms mainly refer to the typical histopathological findings that characterize a special type of mesenteric inflammation without any involvement of the adjacent gut, lymph nodes, or vessels. The inflammatory soft tissue changes mostly affect the mesentery of the small bowel and are characterized by nonfocal lymphoplasmocytic infiltration, fat cell necrosis, foamy macrophages, and focal fibrosis (114). Thickening and retraction of the mesentery occur as a consequence and can be divided into three classes according to Kipfer *et al.* (113): diffuse thickening of the mesentery (type 1); single knotty thickenings at the mesentery root (type 2); and multiple

knotty thickenings of the mesentery (type 3). Fat cell necrosis and lipid-laden macrophages (foam cells) are among the most characteristic and specific findings that could give insights into the pathophysiology of the disease. Whether fat cell necrosis occurs as a primary event triggered by yet unknown mechanisms or whether a primary and sterile (autoimmune?) inflammation causes fat cell necrosis is a matter of uncertainty. Although a severe and fatal disease course is possible (116), it mostly appears as an exclusion diagnosis of an intraabdominal tumor (112, 117) or as a differential diagnosis of uncharacteristic symptoms such as obstipation/diarrhea, ileus, weight loss, fever, and abdominal pain. Although radiological techniques have been significantly improved (118–121), diagnosis still remains a challenge.

**Clinical and therapeutic implications:** Whereas antibiotic treatment seems not to provide a successful therapeutic approach, surgery and immunosuppressants such as corticosteroids, azathioprine, or cyclophosphamide have been used successfully in more severe cases (122–125). There are no data on whether glitazone treatment might improve the clinical course of mesenteric panniculitis. Because PPAR $\gamma$  activation induces the expression of antiinflammatory genes in adipocytes (adiponectin) (126) and has antiinflammatory effects (127) on monocytes/macrophages or endothelium in the context of atherosclerosis (128), glitazone treatment might be a reasonable drug target (129) to be tested in clinical trials or individual patients because the disease is rather rare.

**3. Acute pancreatitis.** Whereas most patients with acute pancreatitis (130) recover without complications, about 10–20% (131, 132) will develop systemic (organ system failure) or local (necrosis, pseudocyst, abscess) complications. Because a variety of therapeutic strategies such as prophylactic antibiotic treatment, early enteral nutrition, endoscopic sphincterotomy, CT-guided drainage, or laparotomy are currently discussed (130), there is a considerable clinical interest in the prediction of severity and risk of necrosis (131, 133–138). Multiple factor scoring systems, including therapy-associated and patient-related factors based on anthropomorphical, clinical, biochemical, and physiological disturbance, have been developed such as the APACHE-II score (139, 140), the APACHE-O score (138), the Glasgow Coma Scale (GCS) (141), and the Ranson score (142). In addition, different radiological scoring systems (133, 143–146) describing the extent of pancreatic and extrapancreatic necrosis have been published, such as the Schröder score (145, 146), the pancreatic necrosis score (146), and the Balthazar score (133, 143, 144, 146).

Markers of trypsinogen activation (131, 135, 147) or the systemic release of cytokines (131, 134, 135, 137, 148, 149) such as IL-10 (150), IL-8 (151, 152), and IL-6 (150, 153) have been evaluated for their potential value in early severity prediction. In clinical praxis, serum glucose (150), serum calcium (150), CRP levels (136, 154), and hematocrit (155) have been reported to be the best widely available markers in predicting the severity of acute pancreatitis.

Obesity is associated with an increased risk of severe outcome in acute pancreatitis (154–157). Accordingly, adding a simple obesity score (by calculating the BMI) to the

APACHE-II score (APACHE-O score) (138) can provide a slightly greater predictive accuracy. This indicates that the adipose tissue compartment, especially the visceral adipose tissue, might play an important pathophysiological role in pancreatitis-associated morbidity and mortality. However, up to now there are no convincing data linking the amount of visceral adipose tissue directly with the clinical outcome of an acute pancreatitis.

Visceral adipose tissue-derived secretory factors might play a role during the clinical course of acute pancreatitis (158). Based on this hypothesis (158), peripancreatic fat cell necrosis could cause a massive release of adipocytokines possibly causing organ dysfunction. Moreover, if highly adipocyte-specific marker proteins such as leptin (36), adiponectin (159), and resistin (160) would be available for routine measurement, these adipocytokines could serve as specific markers for the extent of peripancreatic fat cell necrosis.

The biochemical parameters for predicting the clinical course of acute pancreatitis are currently divided into three (135) categories: 1) markers of pancreatic injury (amylase, lipase); 2) markers of proteolytic activation (trypsinogen pathway); and 3) markers of systemic inflammation (CRP, cytokines). Our intention (158) was to obtain data justifying the addition of a fourth category, *i.e.*, specific markers of fat cell necrosis (adipocytokines).

The role of adiponectin in pancreatitis has not been studied so far, and there exist no precise data on leptin levels during acute necrotizing pancreatitis in humans. In rats, leptin levels were reported to be elevated in both acute ethanol-induced or caerulein-induced pancreatitis (161, 162) and chronic pancreatitis when compared with sham-operated animals. However, no differences between acute and chronic pancreatitis (161) have been observed in these studies. In one single study, leptin levels were measured in patients with edematous pancreatitis and found to be elevated when compared with healthy controls (162). Both in humans with acute edematous pancreatitis and in rats with acute caerulein-induced or ethyl alcohol-induced pancreatitis, plasma leptin levels show a marked increase (161, 162). Both in caerulein-induced (162) and in ischemic (163) pancreatitis, leptin seems to have protective effects on the development of pancreatic damage, probably through activation of the nitric oxide pathway or the limitation of proinflammatory IL-1 $\beta$  release.

Up to now, no data on resistin in the context of acute pancreatitis have been published. Resistin is a member of a new gene family of small cysteine-rich secreted proteins [resistin-like molecule (RELM) $\alpha$ , RELM $\beta$ , RELM $\gamma$ , and resistin] playing an as yet widely uncharacterized role during inflammatory processes (160). In the murine system, lipopolysaccharides (LPS) can increase resistin gene expression *in vivo* and *in vitro* (164). Furthermore, resistin is up-regulated during adipocyte differentiation. Resistin is mainly produced by adipose tissue and monocytes and is secreted from mature adipocytes into the blood stream, where it is detectable in variable amounts by ELISA (165). This observation suggests that resistin acts at sites distant from its synthesis and release (160). Human resistin mRNA expression is higher in abdominal adipose tissue than in sc adipose tissue (166).

**Clinical and therapeutical implications:** To investigate the potential of the adipocytokines resistin, leptin, and adiponectin as specific markers for the extent of peripancreatic fat cell necrosis and to test for possible associations of these adipocytokines with CT-based pancreatic necrosis scoring systems and potential associations with clinical markers, a prospective study in 23 patients with acute pancreatitis is currently being performed by our clinical research group (158). We could demonstrate that: 1) resistin levels are highly elevated in patients with severe pancreatitis when compared with patients with moderate or mild pancreatitis; 2) resistin levels are correlated with the extent of extrapancreatic necrosis; and 3) resistin positively correlates with systemic CRP levels. A suggested cutoff value above 9.2 ng/ml for systemic resistin provides a highly significant positive predictive value of 91.9% for predicting extrapancreatic necrosis with good sensitivity and specificity. Furthermore, resistin levels determined on d 1 (day of admittance) proved to predict a Schröder score greater than 3 with a positive predictive value of 93.3% (cutoff value, 6.95 ng/ml). Accordingly, d 1 resistin can be regarded as a novel parameter indicating peripancreatic fat cell necrosis, expressed as a Schröder score greater than 3. However, confirmatory and larger studies are needed before transferring these results into routine clinical use.

**4. Peritoneal and ascitic fluid.** Leptin is detectable in peritoneal fluid of humans. Although peritoneal leptin levels correlate with BMI and body fat content as do serum leptin levels, ascitic fluid leptin levels are higher than serum levels in the absence of spontaneous bacterial peritonitis (167). Further studies have to be performed to investigate whether there is an intraabdominal production of leptin by peritoneal adipocytes.

**Clinical and therapeutical implications:** It seems reasonable to investigate both locally produced and systemic adipocytokine levels in patients with and without spontaneous bacterial peritonitis because inflammation-induced alteration of local adipocyte function or necrosis of peritoneal adipocytes could release high amounts of adipocytokines that might be used for differential diagnosis of inflammatory *vs.* noninflammatory peritoneal diseases. Interestingly, in mice with experimental bacterial peritonitis, plasma leptin levels increase in response to the induction of TNF- $\alpha$  (168). Moreover, an increase in local adipocytokine production by peritoneal adipocytes in patients with peritoneal tumor spread might have the potential of a tumor marker indicating peritoneal tumor spread. Interestingly, an involvement of leptin in the pathophysiology of Meig's syndrome (ovarian fibroma with ascites and hydrothorax) (169) and pelvic endometriosis (170) has already been suggested.

**5. Nonalcoholic steatohepatitis (NASH)/nonalcoholic fatty liver disease (NAFLD).** Upon several pathophysiological stimuli, the liver reacts with an increased triglyceride storage and a subsequent necroinflammation. Although there are no site-specific adipose cells within the liver, visceral adipocyte-derived adipocytokines play an important role in NASH/NAFLD. Most recently, this new pathophysiological concept was reviewed extensively (12, 171, 172).



### C. Endocrinology

1. *Graves' ophthalmopathy.* Graves' disease as well as associated thyroid eye disease (Graves' ophthalmopathy) and pretibial dermopathy are caused by autoimmune mechanisms leading to goiter and hyperthyroidism (173, 174). The clinical association between hyperthyroidism, ophthalmopathy, and pretibial dermopathy is suggestive for the pathophysiological role of a common antigen shared by these tissues (175). Thyroid eye disease (176) is now thought to result from the action of thyroid-stimulating autoantibodies directed against the TSH receptor. Genetic (human leukocyte antigen system, molecular mimicry), individual (pregnancy), and environmental (smoking) factors determine a patient's susceptibility to develop the disease. There is increasing evidence that orbital fibroblasts in Graves' disease have unique properties responsible for thyroid eye disease, such as an increased potential to differentiate into mature adipocytes, an exaggerated response to proinflammatory cytokines, an increased secretion of proinflammatory cytokines by themselves, and an increased TGF- $\beta$ -, IL-1 $\beta$ -, and leucoregulin-induced hyaluronan synthesis (177–182).

After tolerance against the TSH receptor has been lost, autoreactive T cells trigger an immunological inflammatory reaction in tissue compartments expressing the TSH receptor. Subsequently, a Th-1-like cytokine spectrum (183) is released within the orbital space. A wide variety of mediators (183) such as IL-1 $\alpha$ , IL- $\beta$ , IL-2, IL-6, IL-8, IL-10, IL-12, IFN- $\gamma$ , IGF-I, TGF- $\beta$ , platelet-derived growth factor, and prostaglandin E<sub>2</sub> are released within the orbital tissue of patients with ophthalmopathy, creating a unique and proinflammatory microenvironment for residing fibroblasts and preadipocytes (173, 184). Whereas IL-6 stimulates TSH receptor gene expression in orbital fibroblasts (185), TNF- $\alpha$  and IFN- $\gamma$  have inhibitory effects (186). IL-1 $\beta$  induces tissue inhibitor of metalloproteinase-1 in human orbital fibroblasts, thus modulating both the activity of MMP-1 and the composition of extracellular matrix (180).

In Graves' ophthalmopathy, the overabundance of orbital adipose tissue represents a characteristic finding in many patients. Intriguingly, human orbital fibroblasts/preadipocytes can be differentiated into mature adipocytes using appropriate stimulation protocols (187–189). Because both TSH receptor mRNA (190–196) and protein (188, 189, 191, 193, 194, 197–201) are expressed in orbital fibroblasts and adipocytes, these cells can be directly targeted by TSH receptor autoantibodies. Not only the expression but also the functionality of the TSH receptor on orbital adipose cells has been demonstrated in several studies (187, 188, 197, 200). Treatment of orbital preadipocytes with TSH leads to an up-regulation of TSH receptor gene expression (202). This mechanism might explain the clinical observation that hypothyroidism during antithyroidal drug treatment exacerbates ophthalmopathy.

There is increasing evidence for an enhanced adipogenesis in the orbital tissue of patients suffering from Graves' ophthalmopathy (195). Based on this new pathophysiological concept, orbital fibroblasts can undergo an adipogenic differentiation program (187–189, 195). Orbital mature adipocytes resemble the characteristic gene expression profile known from normal adipose tissue with a characteristic ex-

pression of adipocyte markers such as PPAR $\gamma$ , adiponectin, leptin, perilipin, IL-6, and, LPL (203). Moreover, orbital adipocytes obtained from patients with Graves' ophthalmopathy have been shown to express even higher levels of leptin (187, 189, 195), adiponectin (195), TSH receptor, and PPAR $\gamma$  (195) than orbital tissues from controls.

The stimulus responsible for the increased *de novo* adipogenesis within the orbital space has not been identified yet. A recent study (203) revealed an up-regulation of sFRP (secreted frizzled related protein-1) in orbital tissues from patients with Graves' ophthalmopathy compared with normal orbital soft tissue. Because sFRP functions as an inhibitor of Wnt signaling, a pathway known to inhibit adipogenesis (57), the up-regulation of sFRP in Graves' ophthalmopathy adipose tissue might explain the phenomenon of an increased *de novo* adipogenesis (195). Moreover, treatment of orbital preadipocytes isolated from patients with Graves' ophthalmopathy with recombinant sFRP induces the expression of the genes for adiponectin, leptin, and TSH receptor (195). After adipogenesis has been induced, the increasing amount of functional TSH receptor protein expressed on the surface of orbital adipocytes makes the adipocyte vulnerable to circulating TSH receptor autoantibodies. It is a well-known clinical feature that patients suffering from Graves' ophthalmopathy show a variable presentation ranging from ocular muscle enlargement to orbital connective/adipose tissue enlargement. Because there is a heterogeneity (204) between orbital fibroblasts and extraocular muscle or dermal fibroblasts (*e.g.*, the expression of the surface glycoprotein Thy-1 or the adipogenic potential), differences in the clinical presentation of Graves' ophthalmopathy might be explained by these observations.

Taken together, the infiltration of the orbital tissue with autoreactive T cells and macrophages leads to the secretion of a wide variety of proinflammatory molecules. This proinflammatory environment seems to trigger the adipogenic conversion of fibroblasts and preadipocytes residing within the orbital space. Along with the adipogenic differentiation, adipocyte-specific genes and the TSH receptor gene are strongly up-regulated. The increasing orbital fat mass leads to the clinical symptom of protruding ophthalmopathy. The TSH receptor-positive adipose tissue is then being targeted by TSH receptor autoantibodies, most probably leading to an inflammatory transformation and activation of retroorbital adipocytes.

*Clinical and therapeutical implications:* Treatment of orbital fibroblasts with fenofibrate, a specific activator of PPAR $\alpha$ , induces the adipogenic differentiation program and the expression of the genes encoding the adipogenic protein high-mobility group AT-hook 2, leptin, and the TSH receptor (187). PPAR $\gamma$  is also expressed in orbital fibroblasts and mature adipocytes. PPAR $\gamma$  agonists and antagonists can stimulate or decrease adipogenesis, respectively (205). Based on this observation, it has been reported that treatment of type 2 diabetes mellitus with pioglitazone in coexistent Graves' ophthalmopathy worsened thyroid eye disease due to the expansion of the orbital fat content (205). Similarly, rosiglitazone treatment increased adipogenesis exclusively in orbital preadipocytes (198, 204) but not in fibroblasts de-

rived from other tissues. Moreover, rosiglitazone treatment also induced functional TSH receptor expression during the differentiation process of orbital preadipocytes (198). These observations suggest that exacerbation of thyroid eye disease after glitazone treatment is probably caused not only by fluid retention (edema) but also by an increased orbital adipogenesis leading to an expansion of the orbital fat content. Based on this, PPAR $\gamma$  and/or PPAR $\alpha$  antagonists might represent future drug targets in Graves' ophthalmopathy. However, there are no additional data or clinical studies up to now supporting that hypothesis.

**2. Pretibial dermatopathy.** Pretibial dermatopathy is associated with Graves' disease, and, similar to ophthalmopathy, the pretibial soft tissue containing fibroblasts, preadipocytes, and mature adipocytes is characterized by edema and deposition of hydrophilic glycosaminoglycans. The analysis of the pretibial T cell receptor V gene repertoire showed a restriction of the T cell receptor V usage in both orbital and pretibial tissue in Graves' disease (206). Because preadipocytes and mature adipocytes are localized within pretibial tissue, the TSH receptor expressed locally in pretibial cells (207) might be recognized by oligoclonal T lymphocytes (173, 206). Based on this, pretibial dermatopathy is most probably caused by a similar mechanism, as is the case with ophthalmopathy (175).

#### D. Immunology

**1. Perinodal adipocytes and adipocyte-lymph node interaction.** It is a well-known anatomical feature that lymph nodes are commonly embedded in adipose tissue. However, the interaction between perinodal adipocytes and lymphoid tissues is poorly understood (208–210). Perinodal adipocytes can respond to signals from activated lymphoid cells (210–212). After activation of a lymph node by LPS or proinflammatory stimuli, lipolysis and glycerol release are increased in perinodal adipocytes (212, 213). It seems interesting to speculate that chronic inflammation and lymph node activation influence adipose tissue function (lipolysis, glycerol release), adipose tissue vascularization, and cytokine receptor expression (214, 215). Adipocytes seem to be involved in local immune responses, and their involvement might explain why most lymph nodes are embedded in adipose tissue (211). In contrast, there are only sparse data indicating that perinodal adipocytes and derived adipocytokines can directly influence lymph node function in a paracrine manner during local inflammatory processes. Adipocytes enclosing lymph nodes might serve to supply immune cells with fuel needed during acute and chronic infection (208, 209).

**2. Interaction between fat tissue adipocytes and fat tissue macrophages.** An increasing body of evidence supports a correlative and causative relation between insulin resistance or type 2 diabetes mellitus and inflammation (216). Population studies have linked insulin resistance to systemic inflammation (216–218), and obesity is now regarded as a chronic and low-grade inflammatory state (219–221). Moreover, it has become evident that the adipose tissue connects energy metabolism with immune function and host defense (216, 219, 222–224).

Based on this, it seems noteworthy that of 1,300 gene transcripts expressed in white adipose tissue, about 30% encode inflammatory and macrophage-specific genes (225). The reason is that in the context of obesity, the adipose tissue undergoes an inflammatory transformation and becomes infiltrated by significant amounts of macrophages (9). The percentage of macrophages residing within adipose tissue can vary from less than 10% to more than 50% of cells (225, 226).

Xu *et al.* (227) and Weisberg *et al.* (225) performed two groundbreaking studies published in late 2003 and reviewed by Lehrke and Lazar (8) in 2004. These studies reported for the first time that: 1) adipose tissue is infiltrated by significant amounts of macrophages (but not lymphocytes or granulocytes). The number of macrophages is increasing with adipocyte size and the degree of obesity; 2) inflammatory and macrophage genes (*e.g.*, MCP-1) are up-regulated in obesity-related insulin resistance; and 3) proinflammatory cytokines are produced mainly by adipose tissue-homed macrophages rather than by adipocytes.

There exist two basic mechanisms by which macrophages can infiltrate the adipose tissue: first, macrophages can differentiate from bone marrow-derived monocytes that reached the adipose tissue by diapedesis from the systemic circulation; second, macrophages can *trans*-differentiate from local adipose tissue preadipocytes and mesenchymal stem cells. There is evidence from the literature that both mechanisms play a role in inflammatory adipose tissue remodeling.

The molecular basis for a significant diapedesis of blood monocytes into the adipose tissue (225, 226) is provided by the fact that adipocytes secrete a wide variety of chemoattractants that direct monocytes from the circulation into fat stores (219). MCP-1, macrophage migration inhibitory factor, RANTES (CCL5), and macrophage inflammatory protein-1 $\alpha$  are secreted from adipose tissue (98, 225, 227–230), and an adipose tissue-derived local supply with M-CSF (101) can support the differentiation and maturation of monocytes into macrophages. A recent study (10) could demonstrate that C-C motif chemokine receptor-2 plays an important role in the recruitment of macrophages to adipose tissue, and this new mechanism was reviewed by Neels and Olefsky (9).

Because adipocytes and macrophages share macrophage-specific antigens and because PPAR $\gamma$  controls both adipocyte and macrophage differentiation and function, it has been suggested that adipocytes and macrophages might not be too different (8). This point of view is supported by a study that demonstrated the *trans*-differentiation of preadipocytes into macrophages acquiring phagocytic activity (231). Based on this observation, macrophages and adipocytes might be interconvertible (8), and local *trans*-differentiation of preadipocytes into mature macrophages can now be regarded as an established process.

**Clinical and therapeutical implications:** However, the adipose tissue not only regulates its macrophage content but can also control monocyte and macrophage function by the secretion of pro- and antiinflammatory cytokines and adipocytokines such as leptin and adiponectin (219). In this context, it seems important to emphasize that human macrophages express the adiponectin receptor subtypes, AdipoR1 and AdipoR2, and the full-length leptin receptor (232, 233). The cellular

compartment of the adipose tissue is highly variable and can be transformed into a macrophage-containing tissue compartment under certain conditions. The molecular basis for this concept is provided by the fact that adipocytes can secrete a wide panel of proinflammatory mediators and chemoattractants necessary for local *trans*-differentiation and systemic diapedesis of monocytes/macrophages (7, 219, 234). Future work is necessary to demonstrate which conditions and stimuli trigger this inflammatory remodeling of the adipose tissue.

Macrophages resident within adipose tissue might represent a future drug target for diseases that are characterized by an adipose tissue inflammation. A fascinating perspective of adipose tissue monocytes could be the specific transport and release of drugs or gene products into adipose tissue. A future gene therapy approach for the treatment of obesity could be imaginable. Transgenic monocytes carrying specific genes (*e.g.*, lipases or differentiation inhibitors) under the control of an adipocyte-specific promoter could be directed into fat stores where the gene of interest can be activated locally.

**3. Adipocytokines, innate immunity, and monocyte/macrophage function.** Dendritic cells and macrophages provide a first line of defense against infectious pathogens. Macrophages recognize microbial pathogens by pattern recognition receptors such as toll-like receptors or scavenger receptors. Recognition of foreign microorganisms triggers phagocytosis and the eventual destruction of microorganisms by lysosomal enzymes, reactive oxygen, and nitrogen species. Binding of microbial products like endotoxin stimulates macrophages to release cytokines that influence the innate and, subsequently, the adaptive immune response (235). Adiponectin is an adipocytokine that is highly abundant in human serum, and trimeric, hexameric, and high molecular weight (HMW) isoforms have been described. Mutations in the gene encoding adiponectin can cause impaired multimer formation, lower HMW isoforms in the plasma, or reduced abundance of all adiponectin isoforms owing to a disturbed secretion of adiponectin from the cell (236). Adiponectin exerts immunomodulatory effects and a reduced secretion of the proinflammatory cytokines IL-6, TNF- $\alpha$ , and IFN- $\gamma$ . Moreover, an enhanced release of IL-10 and IL-1RA in endotoxin-activated monocytes has been described (237–239). The immunosuppressive response is partly explained by reduced NF- $\kappa$ B signaling and ERK1/2 activity. Whereas trimeric adiponectin inhibits NF- $\kappa$ B, hexameric and HMW isoforms of this protein activate NF- $\kappa$ B (240) and may explain induction of IL-6 in monocytes treated with HMW adiponectin. HMW adiponectin reduces phagocytosis of apoptotic cells and IL-8 production in the absence of LPS. In contrast, in LPS-stimulated monocytes, both IL-8 secretion and phagocytosis are stimulated. Therefore, adiponectin cannot be regarded as an antiinflammatory protein in general but modulates innate immunity in an isoform-dependent way.

Besides alterations in cytokine response, the macrophage scavenger receptor A is down-regulated by adiponectin (147). Macrophage scavenger receptor A binds LPS from Gram-negative bacteria and lipoteichoic acid from Gram-positive bacteria and mediates nonopsonin-dependent phagocytosis (241). Uptake of fluorescent microspheres is also impaired in adi-

ponectin-treated macrophages. Suppression was mediated by the complement receptor C1qRp, because anti-C1qRp monoclonal antibody abrogated this effect (147).

Blood monocytes may differentiate into macrophages or dendritic cells. In adiponectin-treated macrophages, LPL abundance and phagocytosis is impaired. Furthermore, reduced proliferation but not viability has been described (147). In monocyte-derived dendritic cells, adiponectin did not influence the allostimulatory capacity. Moreover, adiponectin-treated dendritic cells did not show any changes in the cell surface expression of CD80, CD83, CD86, CD1 $\alpha$ , CD11c, CD14, CD40, CD54, CCR6, CCR7, and major histocompatibility complex II, and phagocytic activity was not affected (239). Therefore, adiponectin strongly influences monocytes and macrophages, whereas dendritic cells seem not to be affected by this adipocytokine. Altered cytokine secretion from macrophages may influence the immune response, but the effects of adiponectin on cells of the innate and adaptive immune activation have not been studied in detail. At least levels of circulating adiponectin were shown to be unaltered in animal and human endotoxemia (242–244).

Leptin belongs to the type I cytokine superfamily, and its functional receptor is expressed in immune cells. In monocytes/macrophages, phagocytosis and the secretion of proinflammatory cytokines, nitric oxide (245), and prostaglandin E<sub>2</sub> are potentiated by leptin (233). Proliferation and the surface expression of early and late activation markers are induced on macrophages by recombinant leptin *in vitro* (246). In neutrophils, leptin exerts antiapoptotic effects and stimulates complement-mediated phagocytosis and chemotaxis (247–249). Furthermore, leptin itself is a potent chemoattractant for these cells (248). Leptin also affects natural killer cell differentiation, proliferation, and activation (250). Leptin does not stimulate naive CD4<sup>+</sup> and CD8<sup>+</sup> T cells but enhances proliferation and activation of stimulated T cells, further increasing CD69, CD71 (transferrin receptor), and CD25 ( $\alpha$ -chain of IL-2 receptor) abundance (251). However, in CD4<sup>+</sup> memory T cells, leptin inhibits CD3-induced proliferation and cytokine secretion.

Human leptin deficiency is associated with reduced numbers of circulating CD4<sup>+</sup> T cells, impaired T cell proliferation, and reduced secretion of cytokines such as IL-4, IL-10, and IFN- $\alpha$ . Recombinant leptin nearly restores T cell responsiveness to normal levels and increases cytokine secretion (252). In contrast, administration of recombinant leptin to healthy probands did not influence levels of circulating cytokines (253). Therefore, in leptin-sufficient states, a further elevation of circulating leptin does not affect inflammatory markers.

Plasma leptin levels are increased in sepsis survivors (254) and were found to be elevated both in humans during experimental endotoxemia (255) and in TNF- $\alpha$ -injected humans (256). Although most animal studies indicate that leptin-deficient animals are protected from the toxic effects of innate immunity and T cell-mediated inflammation (257), some studies describe an elevated TNF synthesis in leptin deficiency, an enhanced sensitivity to *Listeria* monocytogenes infection, and a higher endotoxin-induced lethality (258).

In summary, these data indicate that physiological levels of leptin are needed to maintain an optimal immune response. Leptin deficiency or leptin resistance as in obese humans may impair innate and adaptive immune cells. Ac-



cordingly, the risk of infection is higher in states of energy deficiency and excess, both associated with adipocytokine dysregulation (259). Depletion of adipose tissue reduces circulating leptin and adiponectin (260), whereas an elevated fat mass is accompanied by high leptin, peripheral leptin resistance, and low adiponectin (224). Both of these adipokines have immunoregulatory functions, and impaired systemic or local levels of these adipokines may account for a disturbed immune function. These findings further support the idea of an important crosstalk between adipose tissue and the immune system.

### E. Infectiology

**1. Microbial infection of adipose tissue.** Little attention has been given to the role of adipocytes as a primary site of microbial infection. However, adipocytes can be infected directly by *Trypanosoma cruzi* with a high efficiency (170). After infection, the intracellular parasites cluster around lipid droplets and affect the expression and secretion of adipocytokines such as adiponectin. During chronic infection, adipocytes may represent a long-term reservoir for parasites. Similarly, *Mycobacterium leprae* survives intracellularly in preadipocytes, and a multiplication occurs during adipocyte differentiation (261). It has been a matter of controversy whether or not the HIV-1 retrovirus can directly infect adipocytes (262). However, it is becoming clear that human adipocytes can be infected by HIV-1 (263). A productive infection of the adipose tissue by HIV-1 at least requires proinflammatory stimulation of the adipose tissue, *e.g.*, by TNF- $\alpha$  or IL-1 $\beta$  (263). Accordingly, future research should address the adipose tissue as a potential reservoir of chronic microbial infections.

### F. Hematology

**1. The role of bone marrow adipocytes in hematopoiesis and bone homeostasis.** During aging, the hematopoietic bone marrow is becoming more and more replaced by adipose tissue, whereas the number of bone-forming osteoblasts decreases (264–266). This kind of remodeling is caused by a switch of bone marrow mesenchymal stem cell commitment from the osteoblast lineage to the adipocyte lineage (266, 267), probably caused by an increased PPAR $\gamma_2$  expression or activation (264). From one point of view, one could assume that this adipose tissue only functions as a space keeper or as a local energy store. However, because hematopoietically active bone marrow consists of varying amounts of residing preadipocytes and adipocytes, it has long been speculated that adipocytes might act as functional components of bone marrow influencing hematopoiesis in a paracrine manner.

Most importantly in this context, adipocytes and bone marrow stromal cells supporting hematopoiesis develop from the same mesenchymal stem cell (268, 269), and pluripotent stem cells can be isolated from adipose tissue stromal cells (17). Moreover, bone marrow stromal cells have the potential to differentiate into mature adipocytes (269–271). The molecular mechanism behind the commitment of a mesenchymal stem cell toward adipocyte differentiation is only poorly understood but is currently under investigation as a hot topic (269). One important question is whether or not

mesenchymal stem cell-derived adipocytes are different from sc or visceral preadipocyte-derived adipocytes. With respect to several metabolic pathways and the expression of adiponectin and leptin, mesenchymal stem cell-derived adipocytes seem to be comparable to preadipocyte-derived mature adipocytes (269). The transcription factor delta-like-1/Pref-1 is expressed in mesenchymal stem cells and inhibits the adipogenic differentiation program (245).

Because adipocytes are the most abundant stromal cell phenotypes in human adult bone marrow, an important supportive function in hematopoiesis is most likely. Adiponectin and leptin are among the most probable and putative adipocytokines to control hematopoiesis (272). Interestingly, adiponectin serum levels were reported to be inversely correlated with red blood cell counts, white blood cell counts, and platelet counts in peripheral blood (272).

Adiponectin is produced by human bone marrow adipocytes in significant amounts, and both adiponectin receptor subtypes AdipoR1 and AdipoR2 are expressed in adipocytes and monocytes (4). Adiponectin inhibits the differentiation of bone marrow preadipocytes in a paracrine manner (273) by induction of COX-2 gene expression and secretion of prostaglandin E (2). Therefore, adiponectin controls the amount of differentiated adipose tissue within bone marrow. Furthermore, this antiinflammatory adipocytokine has been suggested to act directly on hematopoiesis. Adiponectin inhibits the proliferation of myelomonocytic lineage cells. It suppresses colony formation from several colony-forming units, such as CFU-macrophage, CFU-granulocyte-macrophage, and CFU-granulocyte. In addition, it inhibits the proliferation of several myeloid cell lines (238). Recombinant adiponectin also inhibits lymphopoiesis of early lymphocyte precursors via induction of the cyclooxygenase-prostaglandin E<sub>2</sub> pathway (274).

High-affinity leptin receptors are expressed in human mesenchymal stem cells (275). Leptin is secreted by human bone marrow adipocytes, and its expression is inhibited by IL-1 $\beta$ , IL-6, TNF- $\alpha$ , and IFN- $\gamma$  (276). Using a coculture system, it could be demonstrated that bone marrow adipocytes support a complete myeloid and lymphoid differentiation from human CD34<sup>+</sup> cells (277). Leptin treatment of CD34<sup>+</sup> progenitors stimulates the appearance of granulocyte-macrophage colonies (278–280). Leptin stimulates the proliferation of acute myeloid leukemia cells (281) and, in acute promyelocytic leukemia cells, bone marrow adipocyte-derived leptin stimulates cell survival (282). Due to this stimulatory effect, the leptin-leptin receptor system has been suggested to play a role in the pathophysiology of leukemia (283, 284). Additionally, leptin acts synergistically with erythropoietin to stimulate erythroid development (278).

Despite their influence on hematopoiesis, adiponectin and leptin might also regulate bone formation and bone homeostasis because leptin receptors and the specific adiponectin receptors AdipoR1 and AdipoR2 are expressed in bone and primary human osteoblasts (275, 277). Indeed, adiponectin was shown to increase bone mass by suppressing osteoclastogenesis and increasing osteoblastogenesis (285). In detail, adiponectin induces human osteoblast proliferation via the adiponectin/c-jun N-terminal kinase pathway and osteoblast differentiation via the AdipoR/p38 pathway

(286). Similarly, leptin treatment can prevent bone loss by exerting positive effects on osteoblasts and negative effects on osteoclastogenesis (287, 288). Taken together, these data indicate that bone marrow adipocytes provide a specific microenvironment within the bone cavity to regulate bone metabolism/formation and hematopoiesis.

**Clinical and therapeutical implications:** The local control of adipogenesis and adipocytokine secretion in bone marrow adipocytes might represent a promising drug target in hematology and osteology. Osteoblast activation by adipocytokines could be used for the treatment of osteoporosis and bone diseases. Recombinant adipocytokines might represent future drugs in hematology for lineage-specific stimulation or inhibition of cell growth, differentiation, and proliferation.

### Acknowledgments

Address all correspondence and requests for reprints to: A. Schäffler, M.D., Department of Internal Medicine I, University of Regensburg, D-93042 Regensburg, Germany. E-mail: andreas.schaeffler@klinik.uni-regensburg.de

Review criteria: PubMed/Medline was searched for the terms and issues to be covered in this review. Additionally, information from the Cochrane Library, NCBI nucleotide and protein database, OMIM database, and patent specifications was used.

Disclosure summary: A.S., U.M.-L., J.S., and C.B. have nothing to declare.

### References

- Kershaw EE, Flier JS 2004 Adipose tissue as an endocrine organ. *J Clin Endocrinol Metab* 89:2548–2556
- Shimomura I, Funahashi T, Takahashi M, Maeda K, Kotani K, Nakamura T, Yamashita S, Miura M, Fukuda Y, Takemura K, Tokunaga K, Matsuzawa Y 1996 Enhanced expression of PAI-1 in visceral fat: possible contributor to vascular disease in obesity. *Nat Med* 2:800–803
- Matsuzawa Y 2005 Adipocytokines: emerging therapeutic targets. *Curr Atheroscler Rep* 7:58–62
- Kadowaki T, Yamauchi T 2005 Adiponectin and adiponectin receptors. *Endocr Rev* 26:439–451
- Spiegelman BM, Hu E, Kim JB, Brun R 1997 PPAR  $\gamma$  and the control of adipogenesis. *Biochimie* 79:111–112
- Spiegelman BM, Flier JS 1996 Adipogenesis and obesity: rounding out the big picture. *Cell* 87:377–389
- Trayhurn P, Wood IS 2004 Adipokines: inflammation and the pleiotropic role of white adipose tissue. *Br J Nutr* 92:347–355
- Lehrke M, Lazar MA 2004 Inflamed about obesity. *Nat Med* 10:126–127
- Neels JG, Olefsky JM 2006 Inflamed fat: what starts the fire? *J Clin Invest* 116:33–35
- Weisberg SP, Hunter D, Huber R, Lemieux J, Slaymaker S, Vaddi K, Charo I, Leibel RL, Ferrante Jr AW 2006 CCR2 modulates inflammatory and metabolic effects of high-fat feeding. *J Clin Invest* 116:115–124
- Lee YH, Pratley RE 2005 The evolving role of inflammation in obesity and the metabolic syndrome. *Curr Diab Rep* 5:70–75
- Schäffler A, Schölmerich J, Büchler C 2005 Mechanism of disease: adipocytokines and visceral adipose tissue—emerging role in non-alcoholic fatty liver disease. *Nat Clin Pract Gastroenterol Hepatol* 2:273–280
- Schäffler A, Schölmerich J, Büchler C 2005 Mechanisms of disease: adipocytokines and visceral adipose tissue—emerging role in intestinal and mesenteric diseases. *Nat Clin Pract Gastroenterol Hepatol* 2:103–111
- Lane MD, Tang QQ 2005 From multipotent stem cell to adipocyte. *Birth Defects Res A Clin Mol Teratol* 73:476–477
- Otto TC, Lane MD, Cox MM 2005 Adipose development: from stem cell to adipocyte. *Crit Rev Biochem Mol Biol* 40:229–242
- Dani C 1999 Embryonic stem cell-derived adipogenesis. *Cells Tissues Organs* 165:173–180
- Case J, Horvath TL, Howell JC, Yoder MC, March KL, Srour EF 2005 Clonal multilineage differentiation of murine common pluripotent stem cells isolated from skeletal muscle and adipose stromal cells. *Ann NY Acad Sci* 1044:183–200
- Brun RP, Spiegelman BM 1997 PPAR  $\gamma$  and the molecular control of adipogenesis. *J Endocrinol* 155:217–218
- Brun RP, Kim JB, Hu E, Spiegelman BM 1997 Peroxisome proliferator-activated receptor  $\gamma$  and the control of adipogenesis. *Curr Opin Lipidol* 8:212–218
- Gregoire FM 2001 Adipocyte differentiation: from fibroblast to endocrine cell. *Exp Biol Med* 226:997–1002
- Camp HS, Ren D, Leff T 2002 Adipogenesis and fat-cell function in obesity and diabetes. *Trends Mol Med* 8:442–447
- Urs S, Smith C, Campbell B, Saxton AM, Taylor J, Zhang B, Snoddy J, Jones Voy B, Moustaid-Moussa N 2004 Gene expression profiling in human preadipocytes and adipocytes by microarray analysis. *J Nutr* 134:762–770
- Ntambi JM, Young-Cheul K 2000 Adipocyte differentiation and gene expression. *J Nutr* 130:3122S–3126S
- Margetic S, Gazzola C, Pegg GG, Hill RA 2002 Leptin: a review of its peripheral actions and interactions. *Int J Obes Relat Metab Disord* 26:1407–1433
- Rea R, Donnelly R 2004 Resistin: an adipocyte-derived hormone. Has it a role in diabetes and obesity? *Diabetes Obes Metab* 6:163–170
- Fukuhara A, Matsuda M, Nishizawa M, Segawa K, Tanaka M, Kishimoto K, Matsuki Y, Murakami M, Ichisaka T, Murakami H, Watanabe E, Takagi T, Akiyoshi M, Ohtsubo T, Kihara S, Yamashita S, Makishima M, Funahashi T, Yamanaka S, Hiramatsu R, Matsuzawa Y, Shimomura I 2005 Visfatin: a protein secreted by visceral fat that mimics the effects of insulin. *Science* 307:426–430
- Hug C, Lodish HF 2005 Medicine. Visfatin: a new adipokine. *Science* 307:366–367
- Kralisch S, Klein J, Bluher M, Paschke R, Stumvoll M, Fasshauer M 2005 Therapeutic perspectives of adipocytokines. *Expert Opin Pharmacother* 6:863–872
- Sniderman AD, Cianflone K 1994 The adipin-ASP pathway and regulation of adipocyte function. *Ann Med* 26:388–393
- Schäffler A, Ehling A, Neumann E, Herfarth H, Paul G, Tärner I, Gay S, Scholmerich J, Müller-Ladner U 2003 Genomic organization, promoter, amino acid sequence, chromosomal localization, and expression of the human gene for CORS-26 (collagenous repeat-containing sequence of 26-kDa protein). *Biochim Biophys Acta* 1630:123–129
- Fruhbeck G, Gomez-Ambrosi J, Muruzabal FJ, Burrell MA 2001 The adipocyte: a model for integration of endocrine and metabolic signaling in energy metabolism regulation. *Am J Physiol Endocrinol Metab* 280:E827–E847
- Neumeier M, Weigert J, Schäffler A, Wehrwein G, Müller-Ladner U, Schölmerich J, Wrede C, Büchler C 2006 Different effects of adiponectin isoforms in human monocytic cells. *J Leukoc Biol* 79:803–808
- Diez JJ, Iglesias P 2003 The role of the novel adipocyte-derived hormone adiponectin in human disease. *Eur J Endocrinol* 148:293–300
- Weigert J, Neumeier M, Schäffler A, Fleck M, Schölmerich J, Schutz C, Büchler C 2005 The adiponectin paralog CORS-26 has anti-inflammatory properties and is produced by human monocytic cells. *FEBS Lett* 579:5565–5570
- Koerner A, Kratzsch J, Kiess W 2005 Adipocytokines: leptin—the classical, resistin—the controversial, adiponectin—the promising, and more to come. *Best Pract Res Clin Endocrinol Metab* 19:525–546
- Otero M, Lago R, Lago F, Casanueva FF, Dieguez C, Gomez-Reino JJ, Gualillo O 2005 Leptin, from fat to inflammation: old questions and new insights. *FEBS Lett* 579:295–301
- Rosen ED 2005 The transcriptional basis of adipocyte development. *Prostaglandins Leukot Essent Fatty Acids* 73:31–34
- Gregoire FM, Smas CM, Sul HS 1998 Understanding adipocyte differentiation. *Physiol Rev* 78:783–809

39. Smas CM, Sul HS 1997 Molecular mechanisms of adipocyte differentiation and inhibitory action of pref-1. *Crit Rev Eukaryot Gene Expr* 7:281–298
40. Smas CM, Sul HS 1995 Control of adipocyte differentiation. *Biochem J* 309:697–710
41. Hong JH, Hwang ES, McManus MT, Amsterdam A, Tian Y, Kalmukova R, Mueller E, Benjamin T, Spiegelman BM, Sharp PA, Hopkins N, Yaffe MB 2005 TAZ, a transcriptional modulator of mesenchymal stem cell differentiation. *Science* 309:1074–1078
42. Gonzalez F 2005 Getting fat: two new players in molecular adipogenesis. *Cell Metab* 1:85–86
43. Chen Z, Torrens JI, Anand A, Spiegelman BM, Friedman JM 2005 Krox20 stimulates adipogenesis via C/EBP $\beta$ -dependent and -independent mechanisms. *Cell Metab* 1:93–106
44. Lane MD, Tang QQ, Jiang MS 1999 Role of the CCAAT enhancer binding proteins (C/EBPs) in adipocyte differentiation. *Biochem Biophys Res Commun* 266:677–683
45. Oishi Y, Manabe I, Tobe K, Tsushima K, Shindo T, Fujiu K, Nishimura G, Maemura K, Yamauchi T, Kubota N, Suzuki R, Kitamura T, Akira S, Kadowaki T, Nagai R 2005 Krüppel-like transcription factor KLF5 is a key regulator of adipocyte differentiation. *Cell Metab* 1:27–39
46. Schoonjans K, Martin G, Staels B, Auwerx J 1997 Peroxisome proliferator-activated receptors, orphans with ligands and functions. *Curr Opin Lipidol* 8:159–166
47. Schoonjans K, Staels B, Auwerx J 1996 Role of the peroxisome proliferator-activated receptor (PPAR) in mediating the effects of fibrates and fatty acids on gene expression. *J Lipid Res* 37:907–925
48. Kim JB, Wright HM, Wright M, Spiegelman BM 1998 ADD1/SREBP1 activates PPAR $\gamma$  through the production of endogenous ligand. *Proc Natl Acad Sci USA* 95:4333–4337
49. Holst D, Grimaldi PA 2002 New factors in the regulation of adipose differentiation and metabolism. *Curr Opin Lipidol* 13:241–245
50. Tong Q, Dalgin G, Xu H, Ting CN, Leiden JM, Hotamisligil GS 2000 Function of GATA transcription factors in preadipocyte-adipocyte transition. *Science* 290:134–138
51. Tong Q, Tsai J, Tan G, Dalgin G, Hotamisligil GS 2005 Interaction between GATA and the C/EBP family of transcription factors is critical in GATA-mediated suppression of adipocyte differentiation. *Mol Cell Biol* 25:706–715
52. Ross SE, Hemati N, Longo KA, Bennett CN, Lucas PC, Erickson RL, MacDougald OA 2000 Inhibition of adipogenesis by Wnt signaling. *Science* 289:950–953
53. Kang S, Bajnok L, Longo KA, Petersen RK, Hansen JB, Kristiansen K, MacDougald OA 2005 Effects of Wnt signaling on brown adipocyte differentiation and metabolism mediated by PGC-1 $\alpha$ . *Mol Cell Biol* 25:1272–1282
54. Wu J, Srinivasan SV, Neumann JC, Lingrel JB 2005 The KLF2 transcription factor does not affect the formation of preadipocytes but inhibits their differentiation into adipocytes. *Biochemistry* 44:11098–11105
55. Banerjee SS, Feinberg MW, Watanabe M, Gray S, Haspel RL, Denking DJ, Kawahara R, Hauner H, Jain MK 2003 The Kruppel-like factor KLF2 inhibits peroxisome proliferator-activated receptor- $\gamma$  expression and adipogenesis. *J Biol Chem* 278:2581–2584
56. Sul HS, Smas C, Mei B, Zhou L 2000 Function of pref-1 as an inhibitor of adipocyte differentiation. *Int J Obes Relat Metab Disord* 24(Suppl 4):S15–S19
57. Harp JB 2004 New insights into inhibitors of adipogenesis. *Curr Opin Lipidol* 15:303–307
58. Anders HJ, Rühl M, Heufelder A, Loch O, Schattenkirchner M 1999 Leptin serum levels are not correlated with disease activity in patients with rheumatoid arthritis. *Metabolism* 48:745–748
59. Nishiyama K, Nishiyama M, Chang A, Shinto A, Hashimoto K 2002 [Serum leptin levels in patients with rheumatoid arthritis are correlated with body mass index]. *Rinsho Byori* 50:524–527
60. Popa C, Netea MG, Radstake TR, van Riel PL, Barrera P, van der Meer JW 2005 Markers of inflammation are negatively correlated with serum leptin in rheumatoid arthritis. *Ann Rheum Dis* 64:1195–1198
61. Bokarewa M, Bokarewa D, Hultgren O, Tarkowski A 2003 Leptin consumption in the inflamed joints of patients with rheumatoid arthritis. *Ann Rheum Dis* 62:952–956
62. Dumond H, Presle N, Terlain B, Mainard D, Loeuille D, Netter P, Pottier P 2003 Evidence for a key role of leptin in osteoarthritis. *Arthritis Rheum* 48:3118–3129
63. Perfetto F, Tarquini R, Simonini G, Bindi G, Mancuso F, Guiducci S, Maticci-Cerinic M, Falcini F 2005 Circulating leptin levels in juvenile idiopathic arthritis: a marker of nutritional status? *Ann Rheum Dis* 64:149–152
64. Garcia-Gonzalez A, Gonzalez-Lopez L, Valera-Gonzalez IC, Cardona-Munoz EG, Salazar-Paramo M, Gonzalez-Ortiz M, Martinez-Abundis E, Gamez-Nava JI 2002 Serum leptin levels in women with systemic lupus erythematosus. *Rheumatol Int* 22:138–141
65. Evereklioglu C, Inaloz HS, Kirtak N, Doganay S, Bulbul M, Ozerol E, Er H, Ozbek E 2002 Serum leptin concentration is increased in patients with Behcet's syndrome and is correlated with disease activity. *Br J Dermatol* 147:331–336
66. Ehling A, Schäffler A, Herfarth H, Tarner IH, Anders S, Distler O, Paul G, Distler J, Gay S, Schölmerich J, Neumann E, Müller-Ladner U 2006 The potential of adiponectin in driving arthritis. *J Immunol* 176:4468–4478
67. Ushiyama T, Chano T, Inoue K, Matsusue Y 2003 Cytokine production in the infrapatellar fat pad: another source of cytokines in knee synovial fluids. *Ann Rheum Dis* 62:108–112
68. Schaffler A, Ehling A, Neumann E, Herfarth H, Tarner I, Scholmerich J, Müller-Ladner U, Gay S 2003 Adipocytokines in synovial fluid. *JAMA* 290:1709–1710
69. Zhou Y, Sun X, Jin L, Stringfield T, Lin L, Chen Y 2005 Expression profiles of adiponectin receptors in mouse embryos. *Gene Expr Patterns* 5:711–715
70. Schaffler A, Ehling A, Neumann E, Herfarth H, Paul G, Tarner I, Gay S, Buechler C, Scholmerich J, Müller-Ladner U 2004 Role of specificity protein-1, PPAR $\gamma$ , and pituitary protein transcription factor-1 in transcriptional regulation of the murine CORS-26 promoter. *Biochim Biophys Acta* 1678:150–156
71. Morroni M, De Matteis R, Palumbo C, Ferretti M, Villa I, Rubinacci A, Cinti S, Marotti G 2004 In vivo leptin expression in cartilage and bone cells of growing rats and adult humans. *J Anat* 205:291–296
72. Otero M, Lago R, Lago F, Reino JJ, Gualillo O 2005 Signalling pathway involved in nitric oxide synthase type II activation in chondrocytes: synergistic effect of leptin with interleukin-1. *Arthritis Res Ther* 7:R581–R591
73. Eleftheriou F, Ahn JD, Takeda S, Starbuck M, Yang X, Liu X, Kondo H, Richards WG, Bannon TW, Noda M, Clement K, Vaisse C, Karsenty G 2005 Leptin regulation of bone resorption by the sympathetic nervous system and CART. *Nature* 434:514–520
74. Ehling A, Neumann E, Gay S, Büchler C, Schölmerich J, Schäffler A 2004 Amazing adipocytokines - role in inflammatory diseases? *J Exp Clin Endocrinol Metab* 112:19, 2004. (Abstract)
75. Sweeney SE, Firestein GS 2004 Signal transduction in rheumatoid arthritis. *Curr Opin Rheumatol* 16:231–237
76. Yamasaki S, Nakashima T, Kawakami A, Miyashita T, Tanaka F, Ida H, Migita K, Origuchi T, Eguchi K 2004 Cytokines regulate fibroblast-like synovial cell differentiation to adipocyte-like cells. *Rheumatology (Oxford)* 43:448–452
77. Marie P, Debais F, Cohen-Solal M, de Vernejoul MC 2000 New factors controlling bone remodeling. *Joint Bone Spine* 67:150–156
78. Bokarewa M, Nagaev I, Dahlberg L, Smith U, Tarkowski A 2005 Resistin, an adipokine with potent proinflammatory properties. *J Immunol* 174:5789–5795
79. Busso N, So A, Chobaz-Peclat V, Morard C, Martinez-Soria E, Talbot-Ayer D, Gabay C 2002 Leptin signaling deficiency impairs humoral and cellular immune responses and attenuates experimental arthritis. *J Immunol* 168:875–882
80. Bernotiene E, Palmer G, Talbot-Ayer D, Szalay-Quinodoz I, Aubert ML, Gabay C 2004 Delayed resolution of acute inflammation during zymosan-induced arthritis in leptin-deficient mice. *Arthritis Res Ther* 6:R256–R263
81. Kim CS, Kawada T, Yoo H, Kwon BS, Yu R 2003 Macrophage inflammatory protein-related protein-2, a novel CC chemokine, can



- regulate preadipocyte migration and adipocyte differentiation. *FEBS Lett* 548:125–130
82. Harle P, Pongratz G, Weidler C, Buttner R, Scholmerich J, Straub RH 2004 Possible role of leptin in hypoandrogenicity in patients with systemic lupus erythematosus and rheumatoid arthritis. *Ann Rheum Dis* 63:809–816
  83. Hultgren OH, Tarkowski A 2001 Leptin in septic arthritis: decreased levels during infection and amelioration of disease activity upon its administration. *Arthritis Res* 3:389–394
  84. Müller-Ladner U, Ehling A, Neumann E, Tärner IH, Herfarth H, Grifka J, Schölmerich J, Gay S, Schäffler A 2004 The potential role of adiponectin in driving arthritis. *Arthritis Res Ther* 6(Suppl 3):26
  85. Firestein GS, Zvaifler NJ 2002 How important are T cells in chronic rheumatoid synovitis? II. T cell-independent mechanisms from beginning to end. *Arthritis Rheum* 46:298–308
  86. Ehling A, Schäffler A, Grifka J, Kullmann F, Schölmerich J, Gay S, Müller-Ladner U 2003 Modulation of cytokine and MMP synthesis of synovial fibroblasts by adipocytokine adiponectin and adipocytes. *Arthritis Rheum* 48:477
  87. Desreumaux P, Ernst O, Geboes K, Gambiez L, Berrebi D, Muller-Alouf H, Hafraoui S, Emilie D, Ectors N, Peuchmaur M, Cortot A, Capron M, Auwerx J, Colombel JF 1999 Inflammatory alterations in mesenteric adipose tissue in Crohn's disease. *Gastroenterology* 117:73–81
  88. Herlinger H, Furth EE, Rubesin SE 1998 Fibrofatty proliferation of the mesentery in Crohn disease. *Abdom Imaging* 23:446–448
  89. Schäffler A, Herfarth H 2005 Creeping fat in Crohn's disease: travelling in a creeper lane of research? *Gut* 54:742–744
  90. Sheehan AL, Warren BF, Gear MW, Shepherd NA 1992 Fat-wrapping in Crohn's disease: pathological basis and relevance to surgical practice. *Br J Surg* 79:955–958
  91. Colombel JF 2002 The adipose tissue as a source of proinflammatory signals in Crohn's disease? In: Herfarth H, ed. *Targets of treatment in chronic inflammatory bowel disease: proceedings of Falk Symposium*. Boston: Kluwer Academic Publisher; 99–104
  92. Fazio VW 1983 Regional enteritis (Crohn's disease): indications for surgery and operative strategy. *Surg Clin North Am* 63:27–48
  93. Smedh K, Olaison G, Nystrom PO, Sjodahl R 1993 Intraoperative enteroscopy in Crohn's disease. *Br J Surg* 80:897–900
  94. Knutson H, Lunderquist A 1968 Vascular changes in Crohn's disease. *Am J Roentgenol Radium Ther Nucl Med* 103:380–385
  95. Borley NR, Mortensen NJ, Jewell DP, Warren BF 2000 The relationship between inflammatory and serosal connective tissue changes in ileal Crohn's disease: evidence for a possible causative link. *J Pathol* 190:196–202
  96. Breese EJ, Michie CA, Nicholls SW, Murch SH, Williams CB, Domizio P, Walker-Smith JA, MacDonald TT 1994 Tumor necrosis factor  $\alpha$ -producing cells in the intestinal mucosa of children with inflammatory bowel disease. *Gastroenterology* 106:1455–1466
  97. Karmiris K, Koutroubakis IE, Kouroumalis EA 2005 The emerging role of adipocytokines as inflammatory mediators in inflammatory bowel disease. *Inflamm Bowel Dis* 11:847–855
  98. Schaffler A, Fürst A, Büchler C, Paul G, Rogler G, Schölmerich J, Herfarth H, Secretion of RANTES (CCL5) and IL-10 from mesenteric adipose tissue and from creeping fat in Crohn's disease: regulation by steroid treatment. *J Gastroenterol Hepatol*, in press
  99. Schaffler A, Fürst A, Büchler C, Paul G, Rogler G, Schölmerich J, Herfarth H, VEGF secretion from mesenteric adipose tissue and from creeping fat in Crohn's disease. *J Gastroenterol Hepatol*, in press
  100. Barbier M, Vidal H, Desreumaux P, Dubuquoy L, Bourreille A, Colombel JF, Cherbut C, Galmiche JP 2003 Overexpression of leptin mRNA in mesenteric adipose tissue in inflammatory bowel diseases. *Gastroenterol Clin Biol* 27:987–991
  101. Levine JA, Jensen MD, Eberhardt NL, O'Brien T 1998 Adipocyte macrophage colony-stimulating factor is a mediator of adipose tissue growth. *J Clin Invest* 101:1557–1564
  102. Yamamoto K, Kiyohara T, Murayama Y, Kihara S, Okamoto Y, Funahashi T, Ito T, Nezu R, Tsutsui S, Miyagawa JI, Tamura S, Matsuzawa Y, Shimomura I, Shinomura Y 2005 Production of adiponectin, an anti-inflammatory protein, in mesenteric adipose tissue in Crohn's disease. *Gut* 54:789–796
  103. Sitaraman S, Liu X, Charrier L, Gu LH, Ziegler TR, Gewirtz A, Merlin D 2004 Colonic leptin: source of a novel proinflammatory cytokine involved in IBD. *FASEB J* 18:696–698
  104. Okuno A, Tamemoto H, Tobe K, Ueki K, Mori Y, Iwamoto K, Umehono K, Akanuma Y, Fujiwara T, Horikoshi H, Yazaki Y, Kadowaki T 1998 Troglitazone increases the number of small adipocytes without the change of white adipose tissue mass in obese Zucker rats. *J Clin Invest* 101:1354–1361
  105. Chinetti G, Fruchart JC, Staels B 2000 Peroxisome proliferator-activated receptors (PPARs): nuclear receptors at the crossroads between lipid metabolism and inflammation. *Inflamm Res* 49:497–505
  106. Dubuquoy L, Dharancy S, Nutton S, Pettersson S, Auwerx J, Desreumaux P 2002 Role of peroxisome proliferator-activated receptor  $\gamma$  and retinoid X receptor heterodimer in hepatogastroenterological diseases. *Lancet* 360:1410–1418
  107. Desreumaux P, Dubuquoy L, Nutton S, Peuchmaur M, Englaro W, Schoonjans K, Derijard B, Desvergne B, Wahli W, Chambon P, Leibowitz MD, Colombel JF, Auwerx J 2001 Attenuation of colon inflammation through activators of the retinoid X receptor (RXR)/peroxisome proliferator-activated receptor  $\gamma$  (PPAR $\gamma$ ) heterodimer. A basis for new therapeutic strategies. *J Exp Med* 193:827–838
  108. Wada K, Nakajima A, Blumberg RS 2001 PPAR $\gamma$  and inflammatory bowel disease: a new therapeutic target for ulcerative colitis and Crohn's disease. *Trends Mol Med* 7:329–331
  109. Nakajima A, Katayama K, Mayumi T 2003 [PPAR $\gamma$ -gene therapy using an adenovirus vector for inflammatory bowel disease]. *Nippon Yakurigaku Zasshi* 122:309–316
  110. Katayama K, Wada K, Nakajima A, Mizuguchi H, Hayakawa T, Nakagawa S, Kadowaki T, Nagai R, Kamisaki Y, Blumberg RS, Mayumi T 2003 A novel PPAR  $\gamma$  gene therapy to control inflammation associated with inflammatory bowel disease in a murine model. *Gastroenterology* 124:1315–1324
  111. Nakajima A, Wada K, Miki H, Kubota N, Nakajima N, Terauchi Y, Ohnishi S, Saubermann LJ, Kadowaki T, Blumberg RS, Nagai R, Matsushashi N 2001 Endogenous PPAR  $\gamma$  mediates anti-inflammatory activity in murine ischemia-reperfusion injury. *Gastroenterology* 120:460–469
  112. White B, Kong A, Chang AL 2005 Sclerosing mesenteritis. *Australas Radiol* 49:185–188
  113. Kipfer RE, Moertel CG, Dahlin DC 1974 Mesenteric lipodystrophy. *Ann Intern Med* 80:582–588
  114. Parra-Davila E, McKenney MG, Sleeman D, Hartmann R, Rao RK, McKenney K, Compton RP 1998 Mesenteric panniculitis: case report and literature review. *Am Surg* 64:768–771
  115. Emory TS, Monihan JM, Carr NJ, Sobin LH 1997 Sclerosing mesenteritis, mesenteric panniculitis and mesenteric lipodystrophy: a single entity? *Am J Surg Pathol* 21:392–398
  116. Katsanos KH, Ioachim E, Michail M, Price AC, Agnantis N, Kappas A, Tsianos EV 2004 A fatal case of sclerosing mesenteritis. *Dig Liver Dis* 36:153–156
  117. Kakitsubata Y, Umemura Y, Kakitsubata S, Tamura S, Watanabe K, Abe Y, Hatakeyama K 1993 CT and MRI manifestations of intraabdominal panniculitis. *Clin Imaging* 17:186–188
  118. Kebapci M, Adapinar B, Kaya T, Kebapci N 2004 [Mesenteric panniculitis of the colon: barium enema, US, CT, and MRI findings]. *Tani Girisim Radyol* 10:284–288
  119. van Breda Vriesman AC, Schuttevaer HM, Coerkamp EG, Puy-laert JB 2004 Mesenteric panniculitis: US and CT features. *Eur Radiol* 14:2242–2248
  120. Ghanem N, Pache G, Bley T, Kotter E, Langer M 2005 MR findings in a rare case of sclerosing mesenteritis of the mesocolon. *J Magn Reson Imaging* 21:632–636
  121. Pereira JM, Sirlin CB, Pinto PS, Casola G 2005 CT and MR imaging of extrahepatic fatty masses of the abdomen and pelvis: techniques, diagnosis, differential diagnosis, and pitfalls. *Radiographics* 25:69–85
  122. Genereau T, Bellin MF, Wechsler B, Le TH, Bellanger J, Grellet J, Godeau P 1996 Demonstration of efficacy of combining corticosteroids and colchicine in two patients with idiopathic sclerosing mesenteritis. *Dig Dis Sci* 41:684–688
  123. Bush RW, Hammar Jr SP, Rudolph RH 1986 Sclerosing mesen-

- teritis. Response to cyclophosphamide. *Arch Intern Med* 146:503–505
124. Bala A, Coderre SP, Johnson DR, Nayak V 2001 Treatment of sclerosing mesenteritis with corticosteroids and azathioprine. *Can J Gastroenterol* 15:533–535
  125. Tytgat GN, Roozendaal K, Winter W, Esseveld MR 1980 Successful treatment of a patient with retractile mesenteritis with prednisone and azathioprine. *Gastroenterology* 79:352–356
  126. Stefan N, Stumvoll M 2002 Adiponectin: its role in metabolism and beyond. *Horm Metab Res* 34:469–474
  127. Cabrero A, Laguna JC, Vazquez M 2002 Peroxisome proliferator-activated receptors and the control of inflammation. *Curr Drug Targets Inflamm Allergy* 1:243–248
  128. Zhang L, Chawla A 2004 Role of PPAR $\gamma$  in macrophage biology and atherosclerosis. *Trends Endocrinol Metab* 15:500–505
  129. Li AC, Palinski W 2006 Peroxisome proliferator-activated receptors: how their effects on macrophages can lead to the development of a new drug therapy against atherosclerosis. *Annu Rev Pharmacol Toxicol* 46:1–39
  130. Mitchell RM, Byrne MF, Baillie J 2003 Pancreatitis. *Lancet* 361:1447–1455
  131. Sandberg AA, Borgstrom A 2002 Early prediction of severity in acute pancreatitis. Is this possible? *JOP* 3:116–125
  132. Bradley 3rd EL 1993 A clinically based classification system for acute pancreatitis. Summary of the International Symposium on Acute Pancreatitis, Atlanta, GA, September 11–13, 1992. *Arch Surg* 128:586–590
  133. Balthazar EJ 2002 Acute pancreatitis: assessment of severity with clinical and CT evaluation. *Radiology* 223:603–613
  134. Papachristou GI, Whitcomb DC 2004 Predictors of severity and necrosis in acute pancreatitis. *Gastroenterol Clin North Am* 33:871–890
  135. Sultan S, Baillie J 2002 What are the predictors of post-ERCP pancreatitis, and how useful are they? *JOP* 3:188–194
  136. Yadav D, Agarwal N, Pitchumoni CS 2002 A critical evaluation of laboratory tests in acute pancreatitis. *Am J Gastroenterol* 97:1309–1318
  137. Triester SL, Kowdley KV 2002 Prognostic factors in acute pancreatitis. *J Clin Gastroenterol* 34:167–176
  138. Johnson CD, Toh SK, Campbell MJ 2004 Combination of APACHE-II score and an obesity score (APACHE-O) for the prediction of severe acute pancreatitis. *Pancreatol* 4:1–6
  139. Knaus WA, Draper EA, Wagner DP, Zimmerman JE 1985 APACHE II: a severity of disease classification system. *Crit Care Med* 13:818–829
  140. Wilson C, Heath DI, Imrie CW 1990 Prediction of outcome in acute pancreatitis: a comparative study of APACHE II, clinical assessment and multiple factor scoring systems. *Br J Surg* 77:1260–1264
  141. Osborne DH, Imrie CW, Carter DC 1981 Biliary surgery in the same admission for gallstone-associated acute pancreatitis. *Br J Surg* 68:758–761
  142. Ranson JH, Rifkind KM, Roses DF, Fink SD, Eng K, Spencer FC 1974 Prognostic signs and the role of operative management in acute pancreatitis. *Surg Gynecol Obstet* 139:69–81
  143. Chatzicostas C, Roussomoustakaki M, Vardas E, Romanos J, Kouroumalis EA 2003 Balthazar computed tomography severity index is superior to Ranson criteria and APACHE II and III scoring systems in predicting acute pancreatitis outcome. *J Clin Gastroenterol* 36:253–260
  144. Balthazar EJ 2002 Complications of acute pancreatitis: clinical and CT evaluation. *Radiol Clin North Am* 40:1211–1227
  145. Schroder T, Kivisaari L, Somer K, Standertskjold-Nordenstam CG, Kivilaakso E, Lempinen M 1985 Significance of extrapancreatic findings in computed tomography (CT) of acute pancreatitis. *Eur J Radiol* 5:273–275
  146. van den Biesenbos AR, Kruij PM, Bosscha K, van Leeuwen MS, Feldberg MA, van der Schouw YT, Gooszen HG 1998 Added value of CT criteria compared to the clinical SAP score in patients with acute pancreatitis. *Abdom Imaging* 23:622–626
  147. Ouchi N, Kihara S, Arita Y, Okamoto Y, Maeda K, Kuriyama H, Hotta K, Nishida M, Takahashi M, Muraguchi M, Ohmoto Y, Nakamura T, Yamashita S, Funahashi T, Matsuzawa Y 2000 Adiponectin, an adipocyte-derived plasma protein, inhibits endothelial NF- $\kappa$ B signaling through a cAMP-dependent pathway. *Circulation* 102:1296–1301
  148. Scholmerich J 1996 Interleukins in acute pancreatitis. *Scand J Gastroenterol Suppl* 219:37–42
  149. Messmann H, Vogt W, Holstege A, Lock G, Heinisch A, von Furstenberg A, Leser HG, Zirngibl H, Scholmerich J 1997 Post-ERP pancreatitis as a model for cytokine induced acute phase response in acute pancreatitis. *Gut* 40:80–85
  150. Mentula P, Kylanpaa ML, Kempainen E, Jansson SE, Sarna S, Puolakkainen P, Haapiainen R, Repo H 2005 Early prediction of organ failure by combined markers in patients with acute pancreatitis. *Br J Surg* 92:68–75
  151. Messmann H, Vogt W, Falk W, Vogl D, Zirngibl H, Leser HG, Scholmerich J 1998 Interleukins and their antagonists but not TNF and its receptors are released in post-ERP pancreatitis. *Eur J Gastroenterol Hepatol* 10:611–617
  152. Gross V, Andreessen R, Leser HG, Ceska M, Liehl E, Lausen M, Farthmann EH, Scholmerich J 1992 Interleukin-8 and neutrophil activation in acute pancreatitis. *Eur J Clin Invest* 22:200–203
  153. Leser HG, Gross V, Scheibenbogen C, Heinisch A, Salm R, Lausen M, Ruckauer K, Andreessen R, Farthmann EH, Scholmerich J 1991 Elevation of serum interleukin-6 concentration precedes acute-phase response and reflects severity in acute pancreatitis. *Gastroenterology* 101:782–785
  154. Wilson C, Heads A, Shenkin A, Imrie CW 1989 C-reactive protein, antiproteases and complement factors as objective markers of severity in acute pancreatitis. *Br J Surg* 76:177–181
  155. Gan SI, Romagnuolo J 2004 Admission hematocrit: a simple, useful and early predictor of severe pancreatitis. *Dig Dis Sci* 49:1946–1952
  156. Lankisch PG, Schirren CA 1990 Increased body weight as a prognostic parameter for complications in the course of acute pancreatitis. *Pancreas* 5:626–629
  157. Porter KA, Banks PA 1991 Obesity as a predictor of severity in acute pancreatitis. *Int J Pancreatol* 10:247–252
  158. Schäffler A, Landfried K, Völkl M, Fürst A, Büchler C, Rogler G, Schölmerich J, Herfarth H, The potential of adipocytokines in predicting peripancreatic necrosis and severity in acute pancreatitis. *J Gastroenterol Hepatol*, in press
  159. Trujillo ME, Scherer PE 2005 Adiponectin—journey from an adipocyte secretory protein to biomarker of the metabolic syndrome. *J Intern Med* 257:167–175
  160. Stepan CM, Lazar MA 2004 The current biology of resistin. *J Intern Med* 255:439–447
  161. Yavuz N, Unal E, Memisoglu K, Krando O, Kiziler AR, Aydemir B, Kusan R, Dogan M, Gunes P, Titiz I 2004 Plasma leptin levels in rats with pancreatitis. *Tohoku J Exp Med* 204:243–248
  162. Konturek PC, Jaworek J, Manioglou A, Bonior J, Meixner H, Konturek SJ, Hahn EG 2002 Leptin modulates the inflammatory response in acute pancreatitis. *Digestion* 65:149–160
  163. Warzecha Z, Dembinski A, Ceranowicz P, Jaworek J, Konturek PC, Dembinski M, Bilski J, Konturek SJ 2002 Influence of leptin administration on the course of acute ischemic pancreatitis. *J Physiol Pharmacol* 53:775–790
  164. Lu SC, Shieh WY, Chen CY, Hsu SC, Chen HL 2002 Lipopolysaccharide increases resistin gene expression in vivo and in vitro. *FEBS Lett* 530:158–162
  165. Schäffler A, Büchler C, Müller-Ladner U, Herfarth H, Ehling A, Paul G, Scholmerich J, Zietz B 2004 Identification of variables influencing resistin serum levels in patients with type 1 and type 2 diabetes mellitus. *Horm Metab Res* 36:702–707
  166. McTernan PG, McTernan CL, Chetty R, Jenner K, Fisher FM, Lauer MN, Crocker J, Barnett AH, Kumar S 2002 Increased resistin gene and protein expression in human abdominal adipose tissue. *J Clin Endocrinol Metab* 87:2407
  167. Giannini E, Romagnoli P, Tenconi GL, Botta F, Malfatti F, Chiarbonello B, Mamone M, Barreca T, Testa R 2004 High ascitic fluid leptin levels in patients with decompensated liver cirrhosis and sterile ascites: relationship with TNF- $\alpha$  levels. *Dig Dis Sci* 49:275–280
  168. Moshedydi AK, Josephs MD, Abdalla EK, Mackay SL, Edwards 3rd CK, Copeland 3rd EM, Moldawer LL 1998 Increased leptin



- expression in mice with bacterial peritonitis is partially regulated by tumor necrosis factor  $\alpha$ . *Infect Immun* 66:1800–1802
169. Abramov Y, Anteby SO, Fatum M, Fasouliotis SJ, Barak V 2001 The kinetics of leptin in Meigs' syndrome. *Gynecol Oncol* 83:316–318
  170. Combs TP, Nagajyothi, Mukherjee S, de Almeida CJ, Jelicks LA, Schubert W, Lin Y, Jayabalan DS, Zhao D, Braunstein VL, Landskroner-Eiger S, Cordero A, Factor SM, Weiss LM, Lisanti MP, Tanowitz HB, Scherer PE 2005 The adipocyte as an important target cell for *Trypanosoma cruzi* infection. *J Biol Chem* 280:24085–24094
  171. Larter CZ, Farrell GC 2006 Insulin resistance, adiponectin, cytokines in NASH: which is the best target to treat? *J Hepatol* 44:253–261
  172. Sanyal AJ 2005 Mechanisms of disease: pathogenesis of nonalcoholic fatty liver disease. *Nat Clin Pract Gastroenterol Hepatol* 2:46–53
  173. Heufelder AE 2000 Pathogenesis of ophthalmopathy in autoimmune thyroid disease. *Rev Endocr Metab Disord* 1:87–95
  174. Bahn RS 2003 Clinical review 157: Pathophysiology of Graves' ophthalmopathy—the cycle of disease. *J Clin Endocrinol Metab* 88:1939–1946
  175. Bahn RS 2004 TSH receptor expression in orbital tissue and its role in the pathogenesis of Graves' ophthalmopathy. *J Endocrinol Invest* 27:216–220
  176. Hatton MP, Rubin PA 2002 The pathophysiology of thyroid-associated ophthalmopathy. *Ophthalmol Clin North Am* 15:113–119
  177. Wang HS, Tung WH, Tang KT, Wong YK, Huang GJ, Wu JC, Guo YJ, Chen CC 2005 TGF- $\beta$  induced hyaluronan synthesis in orbital fibroblasts involves protein kinase C  $\beta$ II activation in vitro. *J Cell Biochem* 95:256–267
  178. Smith TJ 2004 Novel aspects of orbital fibroblast pathology. *J Endocrinol Invest* 27:246–253
  179. Bartalena L, Wiersinga WM, Pinchera A 2004 Graves' ophthalmopathy: state of the art and perspectives. *J Endocrinol Invest* 27:295–301
  180. Han R, Smith TJ 2005 Induction by IL-1  $\beta$  of tissue inhibitor of metalloproteinase-1 in human orbital fibroblasts: modulation of gene promoter activity by IL-4 and IFN- $\gamma$ . *J Immunol* 174:3072–3079
  181. Wong YK, Tang KT, Wu JC, Hwang JJ, Wang HS 2001 Stimulation of hyaluronan synthesis by interleukin-1 $\beta$  involves activation of protein kinase C  $\beta$ II in fibroblasts from patients with Graves' ophthalmopathy. *J Cell Biochem* 82:58–67
  182. Smith TJ, Wang HS, Evans CH 1995 Leukoregulin is a potent inducer of hyaluronan synthesis in cultured human orbital fibroblasts. *Am J Physiol* 268:C382–C388
  183. Wakelkamp IM, Bakker O, Baldeschi L, Wiersinga WM, Prummel MF 2003 TSH-R expression and cytokine profile in orbital tissue of active vs. inactive Graves' ophthalmopathy patients. *Clin Endocrinol (Oxf)* 58:280–287
  184. Heufelder AE 2001 [Interactions of fibroblasts, adipocytes and immunocompetent cells in the pathogenesis of endocrine ophthalmopathy]. *Acta Med Austriaca* 28:89–92
  185. Jyonouchi SC, Valyasevi RW, Harteneck DA, Dutton CM, Bahn RS 2001 Interleukin-6 stimulates thyrotropin receptor expression in human orbital preadipocyte fibroblasts from patients with Graves' ophthalmopathy. *Thyroid* 11:929–934
  186. Valyasevi RW, Jyonouchi SC, Dutton CM, Munsakul N, Bahn RS 2001 Effect of tumor necrosis factor- $\alpha$ , interferon- $\gamma$ , and transforming growth factor- $\beta$  on adipogenesis and expression of thyrotropin receptor in human orbital preadipocyte fibroblasts. *J Clin Endocrinol Metab* 86:903–908
  187. Pasquali D, Pierantoni GM, Fusco A, Staibano S, Colantuoni V, De Bellis A, Bellastella A, Sinisi AA 2004 Fenofibrate increases the expression of high mobility group AT-hook 2 (HMGA2) gene and induces adipocyte differentiation of orbital fibroblasts from Graves' ophthalmopathy. *J Mol Endocrinol* 33:133–143
  188. Sorisky A, Pardasani D, Gagnon A, Smith TJ 1996 Evidence of adipocyte differentiation in human orbital fibroblasts in primary culture. *J Clin Endocrinol Metab* 81:3428–3431
  189. Erickson DZ, Harteneck DA, Erickson BJ, Dutton CM, Bahn RS 2001 Induction of leptin expression in orbital preadipocyte fibroblasts. *Thyroid* 11:221–226
  190. Feliciello A, Porcellini A, Ciullo I, Bonavolonta G, Avvedimento EV, Fenzi G 1993 Expression of thyrotropin-receptor mRNA in healthy and Graves' disease retro-orbital tissue. *Lancet* 342:337–338
  191. Heufelder AE, Dutton CM, Sarkar G, Donovan KA, Bahn RS 1993 Detection of TSH receptor RNA in cultured fibroblasts from patients with Graves' ophthalmopathy and pretibial dermatopathy. *Thyroid* 3:297–300
  192. Mengistu M, Lukes YG, Nagy EV, Burch HB, Carr FE, Lahiri S, Burman KD 1994 TSH receptor gene expression in retroocular fibroblasts. *J Endocrinol Invest* 17:437–441
  193. Ludgate M, Crisp M, Lane C, Costagliola S, Vassart G, Weetman A, Daumerie C, Many MC 1998 The thyrotropin receptor in thyroid eye disease. *Thyroid* 8:411–413
  194. Spitzweg C, Joba W, Hunt N, Heufelder AE 1997 Analysis of human thyrotropin receptor gene expression and immunoreactivity in human orbital tissue. *Eur J Endocrinol* 136:599–607
  195. Kumar S, Coenen MJ, Scherer PE, Bahn RS 2004 Evidence for enhanced adipogenesis in the orbits of patients with Graves' ophthalmopathy. *J Clin Endocrinol Metab* 89:930–935
  196. Wu SL, Yang CS, Wang HJ, Liao CL, Chang TJ, Chang TC 1999 Demonstration of thyrotropin receptor mRNA in orbital fat and eye muscle tissues from patients with Graves' ophthalmopathy by in situ hybridization. *J Endocrinol Invest* 22:289–295
  197. Valyasevi RW, Erickson DZ, Harteneck DA, Dutton CM, Heufelder AE, Jyonouchi SC, Bahn RS 1999 Differentiation of human orbital preadipocyte fibroblasts induces expression of functional thyrotropin receptor. *J Clin Endocrinol Metab* 84:2557–2562
  198. Valyasevi RW, Harteneck DA, Dutton CM, Bahn RS 2002 Stimulation of adipogenesis, peroxisome proliferator-activated receptor- $\gamma$  (PPAR $\gamma$ ), and thyrotropin receptor by PPAR $\gamma$  agonist in human orbital preadipocyte fibroblasts. *J Clin Endocrinol Metab* 87:2352–2358
  199. Bahn RS, Dutton CM, Natt N, Joba W, Spitzweg C, Heufelder AE 1998 Thyrotropin receptor expression in Graves' orbital adipose/connective tissues: potential autoantigen in Graves' ophthalmopathy. *J Clin Endocrinol Metab* 83:998–1002
  200. Crisp M, Starkey KJ, Lane C, Ham J, Ludgate M 2000 Adipogenesis in thyroid eye disease. *Invest Ophthalmol Vis Sci* 41:3249–3255
  201. Burch HB, Sellitti D, Barnes SG, Nagy EV, Bahn RS, Burman KD 1994 Thyrotropin receptor antisera for the detection of immunoreactive protein species in retroocular fibroblasts obtained from patients with Graves' ophthalmopathy. *J Clin Endocrinol Metab* 78:1384–1391
  202. Bahn RS, Dutton CM, Joba W, Heufelder AE 1998 Thyrotropin receptor expression in cultured Graves' orbital preadipocyte fibroblasts is stimulated by thyrotropin. *Thyroid* 8:193–196
  203. Kumar S, Leontovich A, Coenen MJ, Bahn RS 2005 Gene expression profiling of orbital adipose tissue from patients with Graves' ophthalmopathy: a potential role for soluble frizzled related protein-1 in orbital adipogenesis. *J Clin Endocrinol Metab* 90:4730–4735
  204. Smith TJ, Koumas L, Gagnon A, Bell A, Sempowski GD, Phipps RP, Sorisky A 2002 Orbital fibroblast heterogeneity may determine the clinical presentation of thyroid-associated ophthalmopathy. *J Clin Endocrinol Metab* 87:385–392
  205. Starkey K, Heufelder A, Baker G, Joba W, Evans M, Davies S, Ludgate M 2003 Peroxisome proliferator-activated receptor- $\gamma$  in thyroid eye disease: contraindication for thiazolidinedione use? *J Clin Endocrinol Metab* 88:55–59
  206. Heufelder AE, Wenzel BE, Scriba PC 1996 Antigen receptor variable region repertoires expressed by T cells infiltrating thyroid, retroorbital, and pretibial tissue in Graves' disease. *J Clin Endocrinol Metab* 81:3733–3739
  207. Daumerie C, Ludgate M, Costagliola S, Many MC 2002 Evidence for thyrotropin receptor immunoreactivity in pretibial connective tissue from patients with thyroid-associated dermatopathy. *Eur J Endocrinol* 146:35–38
  208. Pond CM 2002 Adipose tissue, the immune system and exercise fatigue: how activated lymphocytes compete for lipids. *Biochem Soc Trans* 30:270–275
  209. Pond CM 2000 Adipose tissue: quartermaster to the lymph node garrisons. *Biologist (London)* 47:147–150



210. Pond CM 2001 Long-term changes in adipose tissue in human disease. *Proc Nutr Soc* 60:365–374
211. Pond CM, Mattacks CA 1998 In vivo evidence for the involvement of the adipose tissue surrounding lymph nodes in immune responses. *Immunol Lett* 63:159–167
212. Pond CM, Mattacks CA 1995 Interactions between adipose tissue around lymph nodes and lymphoid cells in vitro. *J Lipid Res* 36:2219–2231
213. Pond CM, Mattacks CA 2002 The activation of the adipose tissue associated with lymph nodes during the early stages of an immune response. *Cytokine* 17:131–139
214. Macqueen HA, Waights V, Pond CM 1999 Vascularisation in adipose depots surrounding immune-stimulated lymph nodes. *J Anat* 194:33–38
215. Priddle JD, Mattacks CA, Sadler DA, MacQueen HA, Pond CM 2003 Changes in lymphokine receptor expression and fatty acid composition of phospholipids and triacylglycerols in rat adipocytes associated with lymph nodes following a transient immune challenge. *Cell Biol Int* 27:23–29
216. Wisse BE 2004 The inflammatory syndrome: the role of adipose tissue cytokines in metabolic disorders linked to obesity. *J Am Soc Nephrol* 15:2792–2800
217. Pickup JC, Crook MA 1998 Is type II diabetes mellitus a disease of the innate immune system? *Diabetologia* 41:1241–1248
218. Pickup JC, Mattock MB, Chusney GD, Burt D 1997 NIDDM as a disease of the innate immune system: association of acute-phase reactants and interleukin-6 with metabolic syndrome X. *Diabetologia* 40:1286–1292
219. Trayhurn P 2005 Adipose tissue in obesity—an inflammatory issue. *Endocrinology* 146:1003–1005
220. Yudkin JS, Stehouwer CD, Emeis JJ, Coppack SW 1999 C-reactive protein in healthy subjects: associations with obesity, insulin resistance, and endothelial dysfunction. A potential role for cytokines originating from adipose tissue? *Arterioscler Thromb Vasc Biol* 19:972–978
221. Festa A, D'Agostino Jr R, Williams K, Karter AJ, Mayer-Davis EJ, Tracy RP, Haffner SM 2001 The relation of body fat mass and distribution to markers of chronic inflammation. *Int J Obes Relat Metab Disord* 25:1407–1415
222. Rajala MW, Obici S, Scherer PE, Rossetti L 2003 Adipose-derived resistin and gut-derived resistin-like molecule- $\beta$  selectively impair insulin action on glucose production. *J Clin Invest* 111:225–230
223. Esterbauer H, Krempler F, Oberkofler H, Patsch W 1999 The complement system: a pathway linking host defence and adipocyte biology. *Eur J Clin Invest* 29:653–656
224. Fantuzzi G 2005 Adipose tissue, adipokines, and inflammation. *J Allergy Clin Immunol* 115:911–919
225. Weisberg SP, McCann D, Desai M, Rosenbaum M, Leibel RL, Ferrante Jr AW 2003 Obesity is associated with macrophage accumulation in adipose tissue. *J Clin Invest* 112:1796–1808
226. Curat CA, Miranville A, Sengenès C, Diehl M, Tonus C, Busse R, Bouloumie A 2004 From blood monocytes to adipose tissue-resident macrophages: induction of diapedesis by human mature adipocytes. *Diabetes* 53:1285–1292
227. Xu H, Barnes GT, Yang Q, Tan G, Yang D, Chou CJ, Sole J, Nichols A, Ross JS, Tartaglia LA, Chen H 2003 Chronic inflammation in fat plays a crucial role in the development of obesity-related insulin resistance. *J Clin Invest* 112:1821–1830
228. Sartipy P, Loskutoff DJ 2003 Monocyte chemoattractant protein 1 in obesity and insulin resistance. *Proc Natl Acad Sci USA* 100:7265–7270
229. Skurk T, Herder C, Kraft I, Muller-Scholz S, Hauner H, Kolb H 2005 Production and release of macrophage migration inhibitory factor from human adipocytes. *Endocrinology* 146:1006–1011
230. Christiansen T, Richelsen B, Bruun JM 2005 Monocyte chemoattractant protein-1 is produced in isolated adipocytes, associated with adiposity and reduced after weight loss in morbid obese subjects. *Int J Obes Relat Metab Disord* 29:146–150
231. Charrière C, Cousin B, Arnaud E, Andre M, Bacou F, Penicaud L, Casteilla L 2003 Preadipocyte conversion to macrophage. Evidence of plasticity. *J Biol Chem* 278:9850–9855
232. Chinetti G, Zawadzki C, Fruchart JC, Staels B 2004 Expression of adiponectin receptors in human macrophages and regulation by agonists of the nuclear receptors PPAR $\alpha$ , PPAR $\gamma$ , and LXR. *Biochem Biophys Res Commun* 314:151–158
233. Gainsford T, Willson TA, Metcalf D, Handman E, McFarlane C, Ng A, Nicola NA, Alexander WS, Hilton DJ 1996 Leptin can induce proliferation, differentiation, and functional activation of hemopoietic cells. *Proc Natl Acad Sci USA* 93:14564–14568
234. Rudin E, Barzilai N 2005 Inflammatory peptides derived from adipose tissue. *Immun Ageing* 2:1
235. Hoebe K, Janssen E, Beutler B 2004 The interface between innate and adaptive immunity. *Nat Immunol* 5:971–974
236. Chandran M, Phillips SA, Ciaraldi T, Henry RR 2003 Adiponectin: more than just another fat cell hormone? *Diabetes Care* 26:2442–2450
237. Wulster-Radcliffe MC, Ajuwon KM, Wang J, Christian JA, Spurlock ME 2004 Adiponectin differentially regulates cytokines in porcine macrophages. *Biochem Biophys Res Commun* 316:924–929
238. Yokota T, Oritani K, Takahashi I, Ishikawa J, Matsuyama A, Ouchi N, Kihara S, Funahashi T, Tenner AJ, Tomiyama Y, Matsuzawa Y 2000 Adiponectin, a new member of the family of soluble defense collagens, negatively regulates the growth of myelomonocytic progenitors and the functions of macrophages. *Blood* 96:1723–1732
239. Wolf AM, Wolf D, Rumpold H, Enrich B, Tilg H 2004 Adiponectin induces the anti-inflammatory cytokines IL-10 and IL-1RA in human leukocytes. *Biochem Biophys Res Commun* 323:630–635
240. Tsao TS, Murrey HE, Hug C, Lee DH, Lodish HF 2002 Oligomerization state-dependent activation of NF- $\kappa$ B signaling pathway by adipocyte complement-related protein of 30 kDa (Acrp30). *J Biol Chem* 277:29359–29362
241. Peiser L, De Winther MP, Makepeace K, Hollinshead M, Coull P, Plested J, Kodama T, Moxon ER, Gordon S 2002 The class A macrophage scavenger receptor is a major pattern recognition receptor for *Neisseria meningitidis* which is independent of lipopolysaccharide and not required for secretory responses. *Infect Immun* 70:5346–5354
242. Keller P, Moller K, Krabbe KS, Pedersen BK 2003 Circulating adiponectin levels during human endotoxaemia. *Clin Exp Immunol* 134:107–110
243. Gomez-Ambrosi J, Becerril S, Oroz P, Zabalza S, Rodriguez A, Muruzabal FJ, Archanco M, Gil MJ, Burrell MA, Fruhbeck G 2004 Reduced adipose tissue mass and hypoleptinemia in iNOS deficient mice: effect of LPS on plasma leptin and adiponectin concentrations. *FEBS Lett* 577:351–356
244. Jacobi SK, Ajuwon KM, Weber TE, Kuske JL, Dyer CJ, Spurlock ME 2004 Cloning and expression of porcine adiponectin, and its relationship to adiposity, lipogenesis and the acute phase response. *J Endocrinol* 182:133–144
245. Abdallah BM, Jensen CH, Gutierrez G, Leslie RG, Jensen TG, Kassem M 2004 Regulation of human skeletal stem cells differentiation by Dlk1/Pref-1. *J Bone Miner Res* 19:841–852
246. Santos-Alvarez J, Goberna R, Sanchez-Margalet V 1999 Human leptin stimulates proliferation and activation of human circulating monocytes. *Cell Immunol* 194:6–11
247. Bruno A, Conus S, Schmid I, Simon HU 2005 Apoptotic pathways are inhibited by leptin receptor activation in neutrophils. *J Immunol* 174:8090–8096
248. Caldefie-Chezet F, Poulin A, Vasson MP 2003 Leptin regulates functional capacities of polymorphonuclear neutrophils. *Free Radic Res* 37:809–814
249. Moore SI, Huffnagle GB, Chen GH, White ES, Mancuso P 2003 Leptin modulates neutrophil phagocytosis of *Klebsiella pneumoniae*. *Infect Immun* 71:4182–4185
250. Tian Z, Sun R, Wei H, Gao B 2002 Impaired natural killer (NK) cell activity in leptin receptor deficient mice: leptin as a critical regulator in NK cell development and activation. *Biochem Biophys Res Commun* 298:297–302
251. Martin-Romero C, Santos-Alvarez J, Goberna R, Sanchez-Margalet V 2000 Human leptin enhances activation and proliferation of human circulating T lymphocytes. *Cell Immunol* 199:15–24
252. Farooqi IS, Matarese G, Lord GM, Keogh JM, Lawrence E, Agwu C, Sanna V, Jebb SA, Perna F, Fontana S, Lechler RI, DePaoli AM, O'Rahilly S 2002 Beneficial effects of leptin on obesity, T cell

- hyporesponsiveness, and neuroendocrine/metabolic dysfunction of human congenital leptin deficiency. *J Clin Invest* 110:1093–1103
253. Chan JL, Moschos SJ, Bullen J, Heist K, Li X, Kim YB, Kahn BB, Mantzoros CS 2005 Recombinant methionyl human leptin administration activates signal transducer and activator of transcription 3 signaling in peripheral blood mononuclear cells *in vivo* and regulates soluble tumor necrosis factor- $\alpha$  receptor levels in humans with relative leptin deficiency. *J Clin Endocrinol Metab* 90:1625–1631
  254. Bornstein SR, Licinio J, Tauchnitz R, Engelmann L, Negrao AB, Gold P, Chrousos GP 1998 Plasma leptin levels are increased in survivors of acute sepsis: associated loss of diurnal rhythm, in cortisol and leptin secretion. *J Clin Endocrinol Metab* 83:280–283
  255. Landman RE, Puder JJ, Xiao E, Freda PU, Ferin M, Wardlaw SL 2003 Endotoxin stimulates leptin in the human and nonhuman primate. *J Clin Endocrinol Metab* 88:1285–1291
  256. Zumbach MS, Boehme MW, Wahl P, Stremmel W, Ziegler R, Nawroth PP 1997 Tumor necrosis factor increases serum leptin levels in humans. *J Clin Endocrinol Metab* 82:4080–4082
  257. Matarese G, Moschos S, Mantzoros CS 2005 Leptin in immunology. *J Immunol* 174:3137–3142
  258. Faggioni R, Fantuzzi G, Gabay C, Moser A, Dinarello CA, Feingold KR, Grunfeld C 1999 Leptin deficiency enhances sensitivity to endotoxin-induced lethality. *Am J Physiol* 276:R136–R142
  259. Marcos A, Nova E, Montero A 2003 Changes in the immune system are conditioned by nutrition. *Eur J Clin Nutr* 57(Suppl 1):S66–S69
  260. Lagathu C, Kim M, Maachi M, Vigouroux C, Cervera P, Capeau J, Caron M, Bastard JP 2005 HIV antiretroviral treatment alters adipokine expression and insulin sensitivity of adipose tissue *in vitro* and *in vivo*. *Biochimie* 87:65–71
  261. Godard CM 1993 [*Mycobacterium leprae*: behavior in the adipocyte undergoing differentiation]. *C R Acad Sci III* 316:1355–1362
  262. Munier S, Borjabad A, Lemaire M, Mariot V, Hazan U 2003 *In vitro* infection of human primary adipose cells with HIV-1: a reassessment. *AIDS* 17:2537–2539
  263. Maurin T, Saillan-Barreau C, Cousin B, Casteilla L, Doglio A, Penicaud L 2005 Tumor necrosis factor- $\alpha$  stimulates HIV-1 production in primary culture of human adipocytes. *Exp Cell Res* 304:544–551
  264. Gimble JM, Robinson CE, Wu X, Kelly KA 1996 The function of adipocytes in the bone marrow stroma: an update. *Bone* 19:421–428
  265. Muschler GF, Nitto H, Boehm CA, Easley KA 2001 Age- and gender-related changes in the cellularity of human bone marrow and the prevalence of osteoblastic progenitors. *J Orthop Res* 19:117–125
  266. Moerman EJ, Teng K, Lipschitz DA, Lecka-Czernik B 2004 Aging activates adipogenic and suppresses osteogenic programs in mesenchymal marrow stroma/stem cells: the role of PPAR- $\gamma$  transcription factor and TGF- $\beta$ /BMP signaling pathways. *Aging Cell* 3:379–389
  267. Wolf NS, Penn PE, Rao D, McKee MD 2003 Intracanal plasticity for bone, smooth muscle, and adipocyte lineages in bone marrow stroma fibroblastoid cells. *Exp Cell Res* 290:346–357
  268. Pittenger MF, Mackay AM, Beck SC, Jaiswal RK, Douglas R, Mosca JD, Moorman MA, Simonetti DW, Craig S, Marshak DR 1999 Multilineage potential of adult human mesenchymal stem cells. *Science* 284:143–147
  269. Ryden M, Dicker A, Gotherstrom C, Astrom G, Tammik C, Arner P, Le Blanc K 2003 Functional characterization of human mesenchymal stem cell-derived adipocytes. *Biochem Biophys Res Commun* 311:391–397
  270. Deryugina EI, Muller-Sieburg CE 1993 Stromal cells in long-term cultures: keys to the elucidation of hematopoietic development? *Crit Rev Immunol* 13:115–150
  271. Friedrich C, Zausch E, Sugrue SP, Gutierrez-Ramos JC 1996 Hematopoietic supportive functions of mouse bone marrow and fetal liver microenvironment: dissection of granulocyte, B-lymphocyte, and hematopoietic progenitor support at the stroma cell clone level. *Blood* 87:4596–4606
  272. Matsubara M, Namioka K, Katayose S 2004 Relationships between plasma adiponectin and blood cells, hepatopancreatic enzymes in women. *Thromb Haemostasis* 91:360–366
  273. Yokota T, Meka CS, Medina KL, Igarashi H, Comp PC, Takahashi M, Nishida M, Oritani K, Miyagawa J, Funahashi T, Tomiyama Y, Matsuzawa Y, Kincade PW 2002 Paracrine regulation of fat cell formation in bone marrow cultures via adiponectin and prostaglandins. *J Clin Invest* 109:1303–1310
  274. Yokota T, Meka CS, Kouro T, Medina KL, Igarashi H, Takahashi M, Oritani K, Funahashi T, Tomiyama Y, Matsuzawa Y, Kincade PW 2003 Adiponectin, a fat cell product, influences the earliest lymphocyte precursors in bone marrow cultures by activation of the cyclooxygenase-prostaglandin pathway in stromal cells. *J Immunol* 171:5091–5099
  275. Hess R, Pino AM, Rios S, Fernandez M, Rodriguez JP 2005 High affinity leptin receptors are present in human mesenchymal stem cells (MSCs) derived from control and osteoporotic donors. *J Cell Biochem* 94:50–57
  276. Laharrague P, Truel N, Fontanilles AM, Corberand JX, Penicaud L, Casteilla L 2000 Regulation by cytokines of leptin expression in human bone marrow adipocytes. *Horm Metab Res* 32:381–385
  277. Berner HS, Lyngstadaas SP, Spahr A, Monjo M, Thommesen L, Drevon CA, Syversen U, Reseland JE 2004 Adiponectin and its receptors are expressed in bone-forming cells. *Bone* 35:842–849
  278. Mikhail AA, Beck EX, Shafer A, Barut B, Gbur JS, Zupancic TJ, Schweitzer AC, Cioffi JA, Lacaud G, Ouyang B, Keller G, Snodgrass HR 1997 Leptin stimulates fetal and adult erythroid and myeloid development. *Blood* 89:1507–1512
  279. Laharrague P, Oppert JM, Brousset P, Charlet JP, Campfield A, Fontanilles AM, Guy-Grand B, Corberand JX, Penicaud L, Casteilla L 2000 High concentration of leptin stimulates myeloid differentiation from human bone marrow CD34+ progenitors: potential involvement in leukocytosis of obese subjects. *Int J Obes Relat Metab Disord* 24:1212–1216
  280. Umamoto Y, Tsuji K, Yang FC, Ebihara Y, Kaneko A, Furukawa S, Nakahata T 1997 Leptin stimulates the proliferation of murine myelocytic and primitive hematopoietic progenitor cells. *Blood* 90:3438–3443
  281. Tabe Y, Konopleva M, Igari J, Andreeff M 2004 Spontaneous migration of acute promyelocytic leukemia cells beneath cultured bone marrow adipocytes with matched expression of the major histocompatibility complex. *Rinsho Byori* 52:642–648
  282. Tabe Y, Konopleva M, Munsell MF, Marini FC, Zompetta C, McQueen T, Tsao T, Zhao S, Pierce S, Igari J, Estey EH, Andreeff M 2004 PML-RAR $\alpha$  is associated with leptin-receptor induction: the role of mesenchymal stem cell-derived adipocytes in APL cell survival. *Blood* 103:1815–1822
  283. Hino M, Nakao T, Yamane T, Ohta K, Takubo T, Tatsumi N 2000 Leptin receptor and leukemia. *Leuk Lymphoma* 36:457–461
  284. Bruserud O, Huang TS, Glenjen N, Gjertsen BT, Foss B 2002 Leptin in human acute myelogenous leukemia: studies of *in vivo* levels and *in vitro* effects on native functional leukemia blasts. *Haematologica* 87:584–595
  285. Oshima K, Nampai A, Matsuda M, Iwaki M, Fukuhara A, Hashimoto J, Yoshikawa H, Shimomura I 2005 Adiponectin increases bone mass by suppressing osteoclast and activating osteoblast. *Biochem Biophys Res Commun* 331:520–526
  286. Luo XH, Guo LJ, Yuan LQ, Xie H, Zhou HD, Wu XP, Liao EY 2005 Adiponectin stimulates human osteoblasts proliferation and differentiation via the MAPK signaling pathway. *Exp Cell Res* 309:99–109
  287. Martin A, de Vittoris R, David V, Moraes R, Begeot M, Lafage-Proust MH, Alexandre C, Vico L, Thomas T 2005 Leptin modulates both resorption and formation while preventing disuse-induced bone loss in tail-suspended female rats. *Endocrinology* 146:3652–3659
  288. Holloway WR, Collier FM, Aitken CJ, Myers DE, Hodge JM, Malakellis M, Gough TJ, Collier GR, Nicholson GC 2002 Leptin inhibits osteoclast generation. *J Bone Miner Res* 17:200–209
